# Supplementary material for: The chromosome-level wintersweet (Chimonanthus praecox) genome provides insights into floral scent biosynthesis and flowering in winter
Source: Genome Biol. 2020 Aug 10;21:200. doi: 10.1186/s13059-020-02088-y (PMC7419205; doi:10.1186/s13059-020-02088-y)
Supplement: Supplementary file 1 — Additional file 1: Table S1. Summary of sequencing data of Chimonanthus praecox and Calycanthus chinensis genome. Table S2. Estimation of genome size of Chimonanthus praecox and Calycanthus chinensis using K-mer analysis. Table S3. Statistic of Chimonanthus praecox and Calycanthus chinensis genome assembly. Table S4. Chromosomes length of wintersweet using HiC reads. Table S5. Assembly results of wintersweet using Hi-C. Table S6. Validation of genome assembly using BUSCO and CEGMA method. Table S7. Statistics of predicted protein-coding genes in Chimonanthus praecox and Calycanthus chinensis genome. Table S8. Functional annotation of the wintersweet protein-coding genes. Table S9. Annotation of conserved non-coding RNA genes in the wintersweet genome. Table S10. Wintersweet-specific gene families. Table S11. The list of expansion genes in wintersweet genome. Table S12. Annotation of repeat sequences in the wintersweet genome. Table S13. List of flowering-time and floral organ identity gene candidates in wintersweet. Table S14. The upregulated expressed genes involved in flowering networks in FBS1 stage compared with FBS2 stage. Table S15. Monthly temperatures in Wuhan (March 2017–February 2018). Table S16. Differently expressed genes between FBS6 and FBS7 stage. Table S17. List of Heat stress transcription factors (Hsf) and DEHYDRATION- RESPONSIVE ELEMENT BINDING PROTEIN (DREB) gene candidates identified in the wintersweet genome. Table S18.The candidate genes involved in the terpene synthesis pathways in wintersweet. Table S19. Terpene synthase family in wintersweet. Table S20. The candidate genes involved in the benzenoid/ phenylpropanoid synthesis pathways in wintersweet. Table S21. The list of transcription factor candidates involved in the regulation of VOCs synthesis in wintersweet. Table S22. Primers for CpTPS genes coloning and MADS-box B&C class genes Real-Time PCR. Table S23. Transporter candidates involved in benzenoid/phenylpropanoid synthesis pathways i [file 13059_2020_2088_MOESM1_ESM.xlsx]

## Sheet: Table S1
Table S1. Summary of sequencing data of Chimonanthus praecox and Calycanthus chinensis genome.
C.praecox				C. chinensis
Pair-end libraries	Insert size	Total data (G)	Sequence coverage (X)	Pair-end libraries	Insert size	Total data (G)	Sequence coverage (X)
Illumina reads	350bp	36.48	46.85	Illumina reads	250bp	58.1	70.25
					450bp	38.87	47
Pacbio reads	20 Kb	76.96	98.83		2K	31.54	38.14
					5K	28.72	34.73
10X Genomics	-	156.26	200.67		10K	14.2	17.17
					20K	14.5	17.53
Total	-	269.7	346.35	Total	-	185.93	224.82

## Sheet: Table S2
Table S2. Estimation of genome size of Chimonanthus praecox and Calycanthus chinensis using K-mer analysis.
specie	K-mer	K-mer number	K-mer Depth	Genome Size（Mbp）	Revised Genome Size (Mbp)	Heterozygous Retio(%)	Repeat(%)
C.chinensis	17	45846717656	54	849.01	827.03	0.25	57.69
C.praecox	17	29471157816	37	796.52	778.71	0.6	56.52

## Sheet: Table S3
Table S3. Statistic of Chimonanthus praecox and Calycanthus chinensis genome assembly.
species	C. praecox				C. chinensis
item	Length		Number		Length		Number
	Contig(bp)	Scaffold(bp)	Contig	Scaffold	Contig	Scaffold	Contig	Scaffold
Total	693452419	695306778	1623	1259	737261137	767429589	291991	241923
Max	11039597	13832003	-	-	296048	9678694	-	-
Length>=2000bp	-	-	1564	1200	-	-	28631	3221
N50	2190841	4490060	99	50	38758	2036242	5512	108
N90	448012	997424	350	166	5648	163685	22240	570

## Sheet: Table S4
Table S4. Chromosomes length of wintersweet using HiC reads
Chr_id	Scaffold number	Length
Chr1	84	86318043
Chr2	87	78725949
Chr3	105	70348455
Chr4	88	68934716
Chr5	88	66035946
Chr6	91	60834809
Chr7	95	60054749
Chr8	109	58471875
Chr9	83	53392713
Chr10	74	47506204
Chr11	123	40646849
TOTAL	1027	691,270,308(99.42%)

## Sheet: Table S5
Table S5. Assembly results of wintersweet using Hi-C
	LACHESIS assembly
Total Length	695.36Mb
L50/N50	5Scaffolds; 65.35 Mb
L90/N90	10Scaffolds; 47.07 Mb
Longest Scaffolds	85.71Mb
Number of Scaffolds	763
Contig N50	2,190.84kb

## Sheet: Table S6
Table S6. Validation of genome assembly using BUSCO and CEGMA method
Species	Size	BUSCO anotation assessment results
C. praecox	695M	C:95%[D:16%]，F:1.6%，M:3.2%，n:956
C: Complete Single-Copy BUSCOs
D: Complete Duplicated BUSCOs
F: Fragmented BUSCOs
M: Missing BUSCOs
n: Total BUSCO groups searched
species	complete		complete + partial
	# Prots num	%completeness	# Prots num	%completeness
C. praecox	218	87.9	230	92.74
Complete：the situation of >70% assembly of core genes
Complete + partial：complete and patial assembly of core genes

## Sheet: Table S7
Table S7. Statistics of predicted protein-coding genes in Chimonanthus praecox and Calycanthus chinensis genome.
Species	Number	Average gene length (bp)	Average CDS length (bp)	Average exons per gene	Average exon length (bp)	Average intron length (bp)
C. praecox	23591	9016.9	1249.67	5.69	219.55	1655.4
Amborella trichopoda	27313	5606.95	944.87	4.06	232.73	1523.55
Nelumbo nucifera	24613	10542.5	1334.94	5.5	242.68	2045.7
Solanum lycopersicum	34674	2940.43	1035.39	4.53	228.81	540.43
Vitis vinifera	28068	4861.34	1138.87	4.93	231.15	947.94
Arabidopsis thaliana	27379	1871.76	1214.84	5.13	236.93	159.16
Oryza sativa	42132	2184.16	986.19	3.88	254.28	416.2
C.chinensis	25280	8615.15	1204.51	5.09	236.43	1809.85

## Sheet: Table S8
Table S8. Functional annotation of the wintersweet protein-coding genes.
Database		C. praecox
		Annotated Num	Annotated Percent(%)
NR		21907	93
Swiss-Prot		18390	78.1
KEGG		17232	73.1
InterPro	All	19408	82.4
	Pfam	18199	77.2
	GO	13494	57.3
Annotated		21940	93.1
Total		23559	-

## Sheet: Table S9
Table S9. Annotation of conserved non-coding RNA genes in the wintersweet genome.
Type		C. praecox
		Copy (w*)	Average length (bp)	Total length (bp)	% of genome
miRNA		909	125.02	113644	0.016344
tRNA		567	74.43	42206	0.00607
rRNA	rRNA	245	273.88	67101	0.009651
	18S	61	743.72	45367	0.006525
	28S	82	128.29	10520	0.001513
	5.8S	29	124.41	3608	0.000519
	5S	73	104.19	7606	0.001094
snRNA	snRNA	1028	110	113080	0.016263
	CD-box	735	104.68	76944	0.011066
	HACA-box	51	128.7	6564	0.000944
	splicing	242	122.19	29572	0.004253

## Sheet: Table S10
Table S10. The list of expansion genes in wintersweet genome.
GENE_ID	GO	IPR	KEGG	Swissprot	NR
AAA19216.1-D16	GO:0000287; magnesium ion binding; Molecular Function::GO:0008152; metabolic process; Biological Process::GO:0010333; terpene synthase activity; Molecular Function::GO:0016829; lyase activity; Molecular Function	IPR001906; Terpene synthase, N-terminal domain::IPR005630; Terpene synthase, metal-binding domain	(-)-germacrene D synthase (EC:4.2.3.22 4.2.3.75); K15803 (-)-germacrene D synthase [EC:4.2.3.22 4.2.3.75] (A)	(-)-germacrene D synthase OS=Vitis vinifera GN=VIT_19s0014g04930 PE=1 SV=1	gi|302143188|emb|CBI20483.3|:unnamed protein product [Vitis vinifera]
AAA19216.1-D19	GO:0000287; magnesium ion binding; Molecular Function::GO:0008152; metabolic process; Biological Process::GO:0010333; terpene synthase activity; Molecular Function::GO:0016829; lyase activity; Molecular Function	IPR001906; Terpene synthase, N-terminal domain::IPR005630; Terpene synthase, metal-binding domain	(-)-germacrene D synthase-like; K15803 (-)-germacrene D synthase [EC:4.2.3.22 4.2.3.75] (A)	Beta-cubebene synthase OS=Magnolia grandiflora PE=1 SV=1	gi|881976353|gb|AKQ19357.1|:terpene synthase 1 [Laurus nobilis]
AAC26017.1-D20	GO:0000287; magnesium ion binding; Molecular Function::GO:0008152; metabolic process; Biological Process::GO:0010333; terpene synthase activity; Molecular Function::GO:0016829; lyase activity; Molecular Function	IPR001906; Terpene synthase, N-terminal domain::IPR005630; Terpene synthase, metal-binding domain	(-)-a-terpineol synthase (EC:4.2.3.111); K18108 (-)-alpha-terpineol synthase [EC:4.2.3.111] (A)	Alpha-terpineol synthase, chloroplastic OS=Magnolia grandiflora PE=1 SV=1	gi|410591616|sp|B3TPQ7.1|ATESY_MAGGA:RecName: Full=Alpha-terpineol synthase, chloroplastic; Short=Mg17; Flags: Precursor [Magnolia grandiflora]
AAS66357.1-D10	GO:0000287; magnesium ion binding; Molecular Function::GO:0008152; metabolic process; Biological Process::GO:0010333; terpene synthase activity; Molecular Function::GO:0016829; lyase activity; Molecular Function	IPR001906; Terpene synthase, N-terminal domain::IPR005630; Terpene synthase, metal-binding domain	(-)-germacrene D synthase (EC:4.2.3.22 4.2.3.75); K15803 (-)-germacrene D synthase [EC:4.2.3.22 4.2.3.75] (A)	(-)-germacrene D synthase OS=Vitis vinifera GN=VIT_19s0014g04930 PE=1 SV=1	gi|302143188|emb|CBI20483.3|:unnamed protein product [Vitis vinifera]
AAS66357.1-D11	GO:0000287; magnesium ion binding; Molecular Function::GO:0008152; metabolic process; Biological Process::GO:0010333; terpene synthase activity; Molecular Function::GO:0016829; lyase activity; Molecular Function	IPR001906; Terpene synthase, N-terminal domain::IPR005630; Terpene synthase, metal-binding domain	(-)-germacrene D synthase (EC:4.2.3.22 4.2.3.75); K15803 (-)-germacrene D synthase [EC:4.2.3.22 4.2.3.75] (A)	(-)-germacrene D synthase OS=Vitis vinifera GN=VIT_19s0014g04930 PE=1 SV=1	gi|147828675|emb|CAN68620.1|:hypothetical protein VITISV_013313 [Vitis vinifera]
AAS66357.1-D2	GO:0000287; magnesium ion binding; Molecular Function::GO:0008152; metabolic process; Biological Process::GO:0010333; terpene synthase activity; Molecular Function::GO:0016829; lyase activity; Molecular Function	IPR001906; Terpene synthase, N-terminal domain::IPR005630; Terpene synthase, metal-binding domain	(-)-germacrene D synthase-like; K15803 (-)-germacrene D synthase [EC:4.2.3.22 4.2.3.75] (A)	Beta-cubebene synthase OS=Magnolia grandiflora PE=1 SV=1	gi|881976353|gb|AKQ19357.1|:terpene synthase 1 [Laurus nobilis]
AAS66357.1-D7	GO:0000287; magnesium ion binding; Molecular Function::GO:0008152; metabolic process; Biological Process::GO:0010333; terpene synthase activity; Molecular Function::GO:0016829; lyase activity; Molecular Function	IPR001906; Terpene synthase, N-terminal domain::IPR005630; Terpene synthase, metal-binding domain	(-)-germacrene D synthase (EC:4.2.3.22 4.2.3.75); K15803 (-)-germacrene D synthase [EC:4.2.3.22 4.2.3.75] (A)	(-)-germacrene D synthase OS=Vitis vinifera GN=VIT_19s0014g04930 PE=1 SV=1	gi|302143188|emb|CBI20483.3|:unnamed protein product [Vitis vinifera]
AAS66357.1-evm.model.scaffold_130.98	GO:0000287; magnesium ion binding; Molecular Function::GO:0008152; metabolic process; Biological Process::GO:0010333; terpene synthase activity; Molecular Function::GO:0016829; lyase activity; Molecular Function	IPR001906; Terpene synthase, N-terminal domain::IPR005630; Terpene synthase, metal-binding domain	(E)-beta-caryophyllene synthase; K15803 (-)-germacrene D synthase [EC:4.2.3.22 4.2.3.75] (A)	Beta-cubebene synthase OS=Magnolia grandiflora PE=1 SV=1	gi|881976353|gb|AKQ19357.1|:terpene synthase 1 [Laurus nobilis]
AAS66358.1-D10	GO:0000287; magnesium ion binding; Molecular Function::GO:0008152; metabolic process; Biological Process::GO:0010333; terpene synthase activity; Molecular Function::GO:0016829; lyase activity; Molecular Function	IPR001906; Terpene synthase, N-terminal domain::IPR005630; Terpene synthase, metal-binding domain	(-)-germacrene D synthase-like; K15803 (-)-germacrene D synthase [EC:4.2.3.22 4.2.3.75] (A)	Beta-cubebene synthase OS=Magnolia grandiflora PE=1 SV=1	gi|881976353|gb|AKQ19357.1|:terpene synthase 1 [Laurus nobilis]
AAS79352.1-D11	GO:0000287; magnesium ion binding; Molecular Function::GO:0008152; metabolic process; Biological Process::GO:0010333; terpene synthase activity; Molecular Function::GO:0016829; lyase activity; Molecular Function	IPR001906; Terpene synthase, N-terminal domain::IPR005630; Terpene synthase, metal-binding domain	(-)-a-terpineol synthase (EC:4.2.3.111); K18108 (-)-alpha-terpineol synthase [EC:4.2.3.111] (A)	Alpha-terpineol synthase, chloroplastic OS=Magnolia grandiflora PE=1 SV=1	gi|410591616|sp|B3TPQ7.1|ATESY_MAGGA:RecName: Full=Alpha-terpineol synthase, chloroplastic; Short=Mg17; Flags: Precursor [Magnolia grandiflora]
AAS79352.1-D15	GO:0000287; magnesium ion binding; Molecular Function::GO:0008152; metabolic process; Biological Process::GO:0010333; terpene synthase activity; Molecular Function::GO:0016829; lyase activity; Molecular Function	IPR001906; Terpene synthase, N-terminal domain::IPR005630; Terpene synthase, metal-binding domain	(-)-a-terpineol synthase (EC:4.2.3.111); K18108 (-)-alpha-terpineol synthase [EC:4.2.3.111] (A)	Alpha-terpineol synthase, chloroplastic OS=Magnolia grandiflora PE=1 SV=1	gi|410591616|sp|B3TPQ7.1|ATESY_MAGGA:RecName: Full=Alpha-terpineol synthase, chloroplastic; Short=Mg17; Flags: Precursor [Magnolia grandiflora]
AAS79352.1-D17	GO:0000287; magnesium ion binding; Molecular Function::GO:0008152; metabolic process; Biological Process::GO:0010333; terpene synthase activity; Molecular Function::GO:0016829; lyase activity; Molecular Function	IPR001906; Terpene synthase, N-terminal domain::IPR005630; Terpene synthase, metal-binding domain	(-)-a-terpineol synthase (EC:4.2.3.111); K18108 (-)-alpha-terpineol synthase [EC:4.2.3.111] (A)	Alpha-terpineol synthase, chloroplastic OS=Magnolia grandiflora PE=1 SV=1	gi|410591616|sp|B3TPQ7.1|ATESY_MAGGA:RecName: Full=Alpha-terpineol synthase, chloroplastic; Short=Mg17; Flags: Precursor [Magnolia grandiflora]
AAS79352.1-D18	GO:0000287; magnesium ion binding; Molecular Function::GO:0008152; metabolic process; Biological Process::GO:0010333; terpene synthase activity; Molecular Function::GO:0016829; lyase activity; Molecular Function	IPR001906; Terpene synthase, N-terminal domain::IPR005630; Terpene synthase, metal-binding domain	(-)-a-terpineol synthase (EC:4.2.3.111); K18108 (-)-alpha-terpineol synthase [EC:4.2.3.111] (A)	Alpha-terpineol synthase, chloroplastic OS=Magnolia grandiflora PE=1 SV=1	gi|410591616|sp|B3TPQ7.1|ATESY_MAGGA:RecName: Full=Alpha-terpineol synthase, chloroplastic; Short=Mg17; Flags: Precursor [Magnolia grandiflora]
AAS79352.1-D19	GO:0000287; magnesium ion binding; Molecular Function::GO:0008152; metabolic process; Biological Process::GO:0010333; terpene synthase activity; Molecular Function::GO:0016829; lyase activity; Molecular Function	IPR001906; Terpene synthase, N-terminal domain::IPR005630; Terpene synthase, metal-binding domain	(-)-a-terpineol synthase (EC:4.2.3.111); K18108 (-)-alpha-terpineol synthase [EC:4.2.3.111] (A)	Alpha-terpineol synthase, chloroplastic OS=Magnolia grandiflora PE=1 SV=1	gi|410591616|sp|B3TPQ7.1|ATESY_MAGGA:RecName: Full=Alpha-terpineol synthase, chloroplastic; Short=Mg17; Flags: Precursor [Magnolia grandiflora]
AAS79352.1-D2	GO:0000287; magnesium ion binding; Molecular Function::GO:0008152; metabolic process; Biological Process::GO:0010333; terpene synthase activity; Molecular Function::GO:0016829; lyase activity; Molecular Function	IPR001906; Terpene synthase, N-terminal domain::IPR005630; Terpene synthase, metal-binding domain	(-)-a-terpineol synthase (EC:4.2.3.111); K18108 (-)-alpha-terpineol synthase [EC:4.2.3.111] (A)	Alpha-terpineol synthase, chloroplastic OS=Magnolia grandiflora PE=1 SV=1	gi|410591616|sp|B3TPQ7.1|ATESY_MAGGA:RecName: Full=Alpha-terpineol synthase, chloroplastic; Short=Mg17; Flags: Precursor [Magnolia grandiflora]
AAS79352.1-D21	GO:0000287; magnesium ion binding; Molecular Function::GO:0008152; metabolic process; Biological Process::GO:0010333; terpene synthase activity; Molecular Function::GO:0016829; lyase activity; Molecular Function	IPR001906; Terpene synthase, N-terminal domain::IPR005630; Terpene synthase, metal-binding domain	(-)-a-terpineol synthase (EC:4.2.3.111); K18108 (-)-alpha-terpineol synthase [EC:4.2.3.111] (A)	Alpha-terpineol synthase, chloroplastic OS=Magnolia grandiflora PE=1 SV=1	gi|410591616|sp|B3TPQ7.1|ATESY_MAGGA:RecName: Full=Alpha-terpineol synthase, chloroplastic; Short=Mg17; Flags: Precursor [Magnolia grandiflora]
AAS79352.1-D6	GO:0000287; magnesium ion binding; Molecular Function::GO:0008152; metabolic process; Biological Process::GO:0010333; terpene synthase activity; Molecular Function::GO:0016829; lyase activity; Molecular Function	IPR001906; Terpene synthase, N-terminal domain::IPR005630; Terpene synthase, metal-binding domain	(-)-a-terpineol synthase (EC:4.2.3.111); K18108 (-)-alpha-terpineol synthase [EC:4.2.3.111] (A)	Alpha-terpineol synthase, chloroplastic OS=Magnolia grandiflora PE=1 SV=1	gi|410591616|sp|B3TPQ7.1|ATESY_MAGGA:RecName: Full=Alpha-terpineol synthase, chloroplastic; Short=Mg17; Flags: Precursor [Magnolia grandiflora]
AAS79352.1-evm.model.scaffold_35.13	GO:0000287; magnesium ion binding; Molecular Function::GO:0008152; metabolic process; Biological Process::GO:0010333; terpene synthase activity; Molecular Function::GO:0016829; lyase activity; Molecular Function	IPR001906; Terpene synthase, N-terminal domain::IPR005630; Terpene synthase, metal-binding domain	(-)-a-terpineol synthase (EC:4.2.3.111); K18108 (-)-alpha-terpineol synthase [EC:4.2.3.111] (A)	Alpha-terpineol synthase, chloroplastic OS=Magnolia grandiflora PE=1 SV=1	gi|410591616|sp|B3TPQ7.1|ATESY_MAGGA:RecName: Full=Alpha-terpineol synthase, chloroplastic; Short=Mg17; Flags: Precursor [Magnolia grandiflora]
AAS79352.1-evm.model.scaffold_35.15	GO:0000287; magnesium ion binding; Molecular Function::GO:0008152; metabolic process; Biological Process::GO:0010333; terpene synthase activity; Molecular Function::GO:0016829; lyase activity; Molecular Function	IPR001906; Terpene synthase, N-terminal domain::IPR005630; Terpene synthase, metal-binding domain	(-)-a-terpineol synthase (EC:4.2.3.111); K18108 (-)-alpha-terpineol synthase [EC:4.2.3.111] (A)	Alpha-terpineol synthase, chloroplastic OS=Magnolia grandiflora PE=1 SV=1	gi|410591616|sp|B3TPQ7.1|ATESY_MAGGA:RecName: Full=Alpha-terpineol synthase, chloroplastic; Short=Mg17; Flags: Precursor [Magnolia grandiflora]
AAV63790.1-evm.model.scaffold_152.30	GO:0000287; magnesium ion binding; Molecular Function::GO:0008152; metabolic process; Biological Process::GO:0010333; terpene synthase activity; Molecular Function::GO:0016829; lyase activity; Molecular Function	IPR001906; Terpene synthase, N-terminal domain::IPR005630; Terpene synthase, metal-binding domain	(-)-a-terpineol synthase (EC:4.2.3.111); K18108 (-)-alpha-terpineol synthase [EC:4.2.3.111] (A)	Alpha-terpineol synthase, chloroplastic OS=Magnolia grandiflora PE=1 SV=1	gi|410591616|sp|B3TPQ7.1|ATESY_MAGGA:RecName: Full=Alpha-terpineol synthase, chloroplastic; Short=Mg17; Flags: Precursor [Magnolia grandiflora]
AAX16121.1-D17	GO:0000287; magnesium ion binding; Molecular Function::GO:0008152; metabolic process; Biological Process::GO:0010333; terpene synthase activity; Molecular Function::GO:0016829; lyase activity; Molecular Function	IPR001906; Terpene synthase, N-terminal domain::IPR005630; Terpene synthase, metal-binding domain	(-)-germacrene D synthase-like; K15803 (-)-germacrene D synthase [EC:4.2.3.22 4.2.3.75] (A)	Beta-cubebene synthase OS=Magnolia grandiflora PE=1 SV=1	gi|881976353|gb|AKQ19357.1|:terpene synthase 1 [Laurus nobilis]
AAX16121.1-D18	GO:0000287; magnesium ion binding; Molecular Function::GO:0008152; metabolic process; Biological Process::GO:0010333; terpene synthase activity; Molecular Function::GO:0016829; lyase activity; Molecular Function	IPR001906; Terpene synthase, N-terminal domain::IPR005630; Terpene synthase, metal-binding domain	(-)-germacrene D synthase (EC:4.2.3.22 4.2.3.75); K15803 (-)-germacrene D synthase [EC:4.2.3.22 4.2.3.75] (A)	(-)-germacrene D synthase OS=Vitis vinifera GN=VIT_19s0014g04930 PE=1 SV=1	gi|526118194|ref|NP_001268213.1|:(-)-germacrene D synthase [Vitis vinifera]
AAX16121.1-evm.model.scaffold_797.21	GO:0000287; magnesium ion binding; Molecular Function::GO:0008152; metabolic process; Biological Process::GO:0010333; terpene synthase activity; Molecular Function::GO:0016829; lyase activity; Molecular Function	IPR001906; Terpene synthase, N-terminal domain::IPR005630; Terpene synthase, metal-binding domain	(-)-germacrene D synthase-like; K15803 (-)-germacrene D synthase [EC:4.2.3.22 4.2.3.75] (A)	Beta-cubebene synthase OS=Magnolia grandiflora PE=1 SV=1	gi|881976353|gb|AKQ19357.1|:terpene synthase 1 [Laurus nobilis]
ABD77416.1-D3	GO:0000287; magnesium ion binding; Molecular Function::GO:0008152; metabolic process; Biological Process::GO:0010333; terpene synthase activity; Molecular Function::GO:0016829; lyase activity; Molecular Function	IPR001906; Terpene synthase, N-terminal domain::IPR005630; Terpene synthase, metal-binding domain	(-)-a-terpineol synthase (EC:4.2.3.111); K18108 (-)-alpha-terpineol synthase [EC:4.2.3.111] (A)	Alpha-terpineol synthase, chloroplastic OS=Magnolia grandiflora PE=1 SV=1	gi|410591616|sp|B3TPQ7.1|ATESY_MAGGA:RecName: Full=Alpha-terpineol synthase, chloroplastic; Short=Mg17; Flags: Precursor [Magnolia grandiflora]
CAC41012.1-D10	GO:0000287; magnesium ion binding; Molecular Function::GO:0008152; metabolic process; Biological Process::GO:0010333; terpene synthase activity; Molecular Function::GO:0016829; lyase activity; Molecular Function	IPR001906; Terpene synthase, N-terminal domain::IPR005630; Terpene synthase, metal-binding domain	(-)-a-terpineol synthase (EC:4.2.3.111); K18108 (-)-alpha-terpineol synthase [EC:4.2.3.111] (A)	Alpha-terpineol synthase, chloroplastic OS=Magnolia grandiflora PE=1 SV=1	gi|225465905|ref|XP_002266808.1|:PREDICTED: (-)-alpha-terpineol synthase [Vitis vinifera]
CAC41012.1-D14	GO:0000287; magnesium ion binding; Molecular Function::GO:0008152; metabolic process; Biological Process::GO:0010333; terpene synthase activity; Molecular Function::GO:0016829; lyase activity; Molecular Function	IPR001906; Terpene synthase, N-terminal domain::IPR005630; Terpene synthase, metal-binding domain	(-)-a-terpineol synthase (EC:4.2.3.111); K18108 (-)-alpha-terpineol synthase [EC:4.2.3.111] (A)	Alpha-terpineol synthase, chloroplastic OS=Magnolia grandiflora PE=1 SV=1	gi|225465905|ref|XP_002266808.1|:PREDICTED: (-)-alpha-terpineol synthase [Vitis vinifera]
CAC41012.1-D5	GO:0000287; magnesium ion binding; Molecular Function::GO:0008152; metabolic process; Biological Process::GO:0010333; terpene synthase activity; Molecular Function::GO:0016829; lyase activity; Molecular Function	IPR001906; Terpene synthase, N-terminal domain::IPR005630; Terpene synthase, metal-binding domain	(-)-a-terpineol synthase (EC:4.2.3.111); K18108 (-)-alpha-terpineol synthase [EC:4.2.3.111] (A)	Alpha-terpineol synthase, chloroplastic OS=Magnolia grandiflora PE=1 SV=1	gi|225465905|ref|XP_002266808.1|:PREDICTED: (-)-alpha-terpineol synthase [Vitis vinifera]
CAD29734.2-D12	GO:0000287; magnesium ion binding; Molecular Function::GO:0008152; metabolic process; Biological Process::GO:0010333; terpene synthase activity; Molecular Function::GO:0016829; lyase activity; Molecular Function	IPR001906; Terpene synthase, N-terminal domain::IPR005630; Terpene synthase, metal-binding domain	(-)-a-terpineol synthase (EC:4.2.3.111); K18108 (-)-alpha-terpineol synthase [EC:4.2.3.111] (A)	Alpha-terpineol synthase, chloroplastic OS=Magnolia grandiflora PE=1 SV=1	gi|410591616|sp|B3TPQ7.1|ATESY_MAGGA:RecName: Full=Alpha-terpineol synthase, chloroplastic; Short=Mg17; Flags: Precursor [Magnolia grandiflora]
CAK55186.1-D15	GO:0000287; magnesium ion binding; Molecular Function::GO:0008152; metabolic process; Biological Process::GO:0010333; terpene synthase activity; Molecular Function::GO:0016829; lyase activity; Molecular Function	IPR001906; Terpene synthase, N-terminal domain::IPR005630; Terpene synthase, metal-binding domain	(-)-a-terpineol synthase (EC:4.2.3.111); K18108 (-)-alpha-terpineol synthase [EC:4.2.3.111] (A)	Alpha-terpineol synthase, chloroplastic OS=Magnolia grandiflora PE=1 SV=1	gi|410591616|sp|B3TPQ7.1|ATESY_MAGGA:RecName: Full=Alpha-terpineol synthase, chloroplastic; Short=Mg17; Flags: Precursor [Magnolia grandiflora]
CAK55186.1-D17	GO:0000287; magnesium ion binding; Molecular Function::GO:0008152; metabolic process; Biological Process::GO:0010333; terpene synthase activity; Molecular Function::GO:0016829; lyase activity; Molecular Function	IPR001906; Terpene synthase, N-terminal domain::IPR005630; Terpene synthase, metal-binding domain	(-)-a-terpineol synthase (EC:4.2.3.111); K18108 (-)-alpha-terpineol synthase [EC:4.2.3.111] (A)	Alpha-terpineol synthase, chloroplastic OS=Magnolia grandiflora PE=1 SV=1	gi|410591616|sp|B3TPQ7.1|ATESY_MAGGA:RecName: Full=Alpha-terpineol synthase, chloroplastic; Short=Mg17; Flags: Precursor [Magnolia grandiflora]
CAK55186.1-D25	GO:0000287; magnesium ion binding; Molecular Function::GO:0008152; metabolic process; Biological Process::GO:0010333; terpene synthase activity; Molecular Function::GO:0016829; lyase activity; Molecular Function	IPR001906; Terpene synthase, N-terminal domain::IPR005630; Terpene synthase, metal-binding domain	(-)-a-terpineol synthase (EC:4.2.3.111); K18108 (-)-alpha-terpineol synthase [EC:4.2.3.111] (A)	Alpha-terpineol synthase, chloroplastic OS=Magnolia grandiflora PE=1 SV=1	gi|410591616|sp|B3TPQ7.1|ATESY_MAGGA:RecName: Full=Alpha-terpineol synthase, chloroplastic; Short=Mg17; Flags: Precursor [Magnolia grandiflora]
evm.model.scaffold_101.171	GO:0004553; hydrolase activity, hydrolyzing O-glycosyl compounds; Molecular Function::GO:0005975; carbohydrate metabolic process; Biological Process	IPR001360; Glycoside hydrolase, family 1	beta-glucosidase 12-like; K01188 beta-glucosidase [EC:3.2.1.21] (A)	Furostanol glycoside 26-O-beta-glucosidase OS=Cheilocostus speciosus GN=F26G PE=1 SV=1	gi|695033570|ref|XP_009404265.1|:PREDICTED: beta-glucosidase 12-like [Musa acuminata subsp. malaccensis]
evm.model.scaffold_101.173	GO:0004553; hydrolase activity, hydrolyzing O-glycosyl compounds; Molecular Function::GO:0005975; carbohydrate metabolic process; Biological Process	IPR001360; Glycoside hydrolase, family 1	beta-glucosidase 12-like; K01188 beta-glucosidase [EC:3.2.1.21] (A)	Furostanol glycoside 26-O-beta-glucosidase OS=Cheilocostus speciosus GN=F26G PE=1 SV=1	gi|672111283|ref|XP_008799933.1|:PREDICTED: beta-glucosidase 12-like [Phoenix dactylifera]
evm.model.scaffold_101.215	GO:0005506; iron ion binding; Molecular Function::GO:0005515; protein binding; Molecular Function::GO:0016165; lipoxygenase activity; Molecular Function::GO:0016702; oxidoreductase activity, acting on single donors with incorporation of molecular oxygen, incorporation of two atoms of oxygen; Molecular Function::GO:0046872; metal ion binding; Molecular Function::GO:0055114; oxidation-reduction pro…	IPR000907; Lipoxygenase::IPR001024; PLAT/LH2 domain::IPR001246; Lipoxygenase, plant::IPR013819; Lipoxygenase, C-terminal	linoleate 9S-lipoxygenase 6-like; K00454 lipoxygenase [EC:1.13.11.12] (A)	Linoleate 9S-lipoxygenase A OS=Solanum lycopersicum GN=LOX1.1 PE=2 SV=1	gi|802546423|ref|XP_012084809.1|:PREDICTED: linoleate 9S-lipoxygenase 6-like [Jatropha curcas]
evm.model.scaffold_1016.67	GO:0005515; protein binding; Molecular Function	IPR001611; Leucine-rich repeat::IPR003591; Leucine-rich repeat, typical subtype::IPR025875; Leucine rich repeat 4	LRR receptor-like serine/threonine-protein kinase FLS2; K13420 LRR receptor-like serine/threonine-protein kinase FLS2 [EC:2.7.11.1] (A)	LRR receptor-like serine/threonine-protein kinase GSO2 OS=Arabidopsis thaliana GN=GSO2 PE=2 SV=2	gi|698476840|ref|XP_009785692.1|:PREDICTED: LRR receptor-like serine/threonine-protein kinase GSO1 isoform X1 [Nicotiana sylvestris]
evm.model.scaffold_1027.1	GO:0005506; iron ion binding; Molecular Function::GO:0009055; electron carrier activity; Molecular Function::GO:0016705; oxidoreductase activity, acting on paired donors, with incorporation or reduction of molecular oxygen; Molecular Function::GO:0020037; heme binding; Molecular Function::GO:0055114; oxidation-reduction process; Biological Process	IPR001128; Cytochrome P450::IPR002401; Cytochrome P450, E-class, group I	cytochrome P450 71B36-like; K00512 steroid 17alpha-monooxygenase / 17alpha-hydroxyprogesterone aldolase [EC:1.14.14.19 4.1.2.30] (A)	Cytochrome P450 71B34 OS=Arabidopsis thaliana GN=CYP71B34 PE=2 SV=1	gi|672127174|ref|XP_008787049.1|:PREDICTED: cytochrome P450 71A1-like [Phoenix dactylifera]
evm.model.scaffold_1067.38	GO:0016747; transferase activity, transferring acyl groups other than amino-acyl groups; Molecular Function	IPR003480; Transferase	shikimate O-hydroxycinnamoyltransferase-like; K13065 shikimate O-hydroxycinnamoyltransferase [EC:2.3.1.133] (A)	Shikimate O-hydroxycinnamoyltransferase OS=Nicotiana tabacum GN=HST PE=1 SV=1	gi|720030474|ref|XP_010265527.1|:PREDICTED: shikimate O-hydroxycinnamoyltransferase-like [Nelumbo nucifera]
evm.model.scaffold_107.2	GO:0004672; protein kinase activity; Molecular Function::GO:0004713; protein tyrosine kinase activity; Molecular Function::GO:0005524; ATP binding; Molecular Function::GO:0006468; protein phosphorylation; Biological Process::GO:0030247; polysaccharide binding; Molecular Function	IPR000719; Protein kinase domain::IPR001245; Serine-threonine/tyrosine-protein kinase catalytic domain::IPR002290; Serine/threonine- / dual specificity protein kinase, catalytic domain::IPR020635; Tyrosine-protein kinase, catalytic domain::IPR025287; Wall-associated receptor kinase galacturonan-binding domain	probable receptor-like protein kinase At5g39020; K04730 interleukin-1 receptor-associated kinase 1 [EC:2.7.11.1] (A)	Glycerophosphodiester phosphodiesterase protein kinase domain-containing GDPDL2 OS=Arabidopsis thaliana GN=GDPDL2 PE=1 SV=1	gi|743858238|ref|XP_010942304.1|:PREDICTED: putative cysteine-rich receptor-like protein kinase 32 isoform X1 [Elaeis guineensis]
evm.model.scaffold_107.5	GO:0004672; protein kinase activity; Molecular Function::GO:0004713; protein tyrosine kinase activity; Molecular Function::GO:0005524; ATP binding; Molecular Function::GO:0006468; protein phosphorylation; Biological Process::GO:0030247; polysaccharide binding; Molecular Function	IPR000719; Protein kinase domain::IPR002290; Serine/threonine- / dual specificity protein kinase, catalytic domain::IPR020635; Tyrosine-protein kinase, catalytic domain::IPR025287; Wall-associated receptor kinase galacturonan-binding domain	probable receptor-like protein kinase At5g39020; K04730 interleukin-1 receptor-associated kinase 1 [EC:2.7.11.1] (A)	Probable receptor-like protein kinase At1g67000 OS=Arabidopsis thaliana GN=At1g67000 PE=2 SV=2	gi|743858240|ref|XP_010942305.1|:PREDICTED: probable receptor-like protein kinase At1g67000 isoform X2 [Elaeis guineensis]
evm.model.scaffold_1095.2_evm.model.scaffold_1095.3	GO:0004672; protein kinase activity; Molecular Function::GO:0004713; protein tyrosine kinase activity; Molecular Function::GO:0005524; ATP binding; Molecular Function::GO:0006468; protein phosphorylation; Biological Process::GO:0030247; polysaccharide binding; Molecular Function	IPR000719; Protein kinase domain::IPR002290; Serine/threonine- / dual specificity protein kinase, catalytic domain::IPR020635; Tyrosine-protein kinase, catalytic domain::IPR025287; Wall-associated receptor kinase galacturonan-binding domain	hypothetical protein; K04730 interleukin-1 receptor-associated kinase 1 [EC:2.7.11.1] (A)	Glycerophosphodiester phosphodiesterase protein kinase domain-containing GDPDL2 OS=Arabidopsis thaliana GN=GDPDL2 PE=1 SV=1	gi|743858238|ref|XP_010942304.1|:PREDICTED: putative cysteine-rich receptor-like protein kinase 32 isoform X1 [Elaeis guineensis]
evm.model.scaffold_110.78	GO:0005506; iron ion binding; Molecular Function::GO:0009055; electron carrier activity; Molecular Function::GO:0016705; oxidoreductase activity, acting on paired donors, with incorporation or reduction of molecular oxygen; Molecular Function::GO:0020037; heme binding; Molecular Function::GO:0055114; oxidation-reduction process; Biological Process	IPR001128; Cytochrome P450::IPR002401; Cytochrome P450, E-class, group I	cytochrome P450 71A9-like; K00512 steroid 17alpha-monooxygenase / 17alpha-hydroxyprogesterone aldolase [EC:1.14.14.19 4.1.2.30] (A)	Cytochrome P450 71A9 OS=Glycine max GN=CYP71A9 PE=2 SV=1	gi|731427072|ref|XP_010663828.1|:PREDICTED: cytochrome P450 71A9-like [Vitis vinifera]
evm.model.scaffold_1112.2	NA	NA	olfactory receptor 142-like; K04257 olfactory receptor (A)	Putative uncharacterized protein ART2 OS=Saccharomyces cerevisiae (strain ATCC 204508 / S288c) GN=ART2 PE=5 SV=1	gi|320031195|gb|EFW13181.1|:senescence-associated protein [Coccidioides posadasii str. Silveira]
evm.model.scaffold_1153.10	GO:0004672; protein kinase activity; Molecular Function::GO:0004713; protein tyrosine kinase activity; Molecular Function::GO:0005524; ATP binding; Molecular Function::GO:0006468; protein phosphorylation; Biological Process::GO:0030247; polysaccharide binding; Molecular Function	IPR000719; Protein kinase domain::IPR002290; Serine/threonine- / dual specificity protein kinase, catalytic domain::IPR020635; Tyrosine-protein kinase, catalytic domain::IPR025287; Wall-associated receptor kinase galacturonan-binding domain	probable receptor-like protein kinase At5g39030; K04730 interleukin-1 receptor-associated kinase 1 [EC:2.7.11.1] (A)	Probable receptor-like protein kinase At5g39020 OS=Arabidopsis thaliana GN=At5g39020 PE=2 SV=1	gi|590673834|ref|XP_007038999.1|:Kinase, putative isoform 2 [Theobroma cacao]
evm.model.scaffold_1166.9	GO:0005515; protein binding; Molecular Function	IPR001611; Leucine-rich repeat::IPR003591; Leucine-rich repeat, typical subtype	Leucine-rich receptor-like protein kinase family protein; K13415 protein brassinosteroid insensitive 1 [EC:2.7.10.1 2.7.11.1] (A)	LRR receptor-like serine/threonine-protein kinase GSO1 OS=Arabidopsis thaliana GN=GSO1 PE=2 SV=1	gi|720046248|ref|XP_010270448.1|:PREDICTED: LRR receptor-like serine/threonine-protein kinase ERECTA [Nelumbo nucifera]
evm.model.scaffold_117.193	GO:0004553; hydrolase activity, hydrolyzing O-glycosyl compounds; Molecular Function::GO:0005975; carbohydrate metabolic process; Biological Process	IPR001360; Glycoside hydrolase, family 1	beta-glucosidase 6; K01188 beta-glucosidase [EC:3.2.1.21] (A)	Beta-glucosidase 6 OS=Oryza sativa subsp. japonica GN=BGLU6 PE=1 SV=1	gi|743837193|ref|XP_010936327.1|:PREDICTED: beta-glucosidase 6 isoform X2 [Elaeis guineensis]
evm.model.scaffold_117.508	GO:0004650; polygalacturonase activity; Molecular Function::GO:0005975; carbohydrate metabolic process; Biological Process	IPR000743; Glycoside hydrolase, family 28::IPR006626; Parallel beta-helix repeat	exopolygalacturonase; K01213 galacturan 1,4-alpha-galacturonidase [EC:3.2.1.67] (A)	Exopolygalacturonase (Fragment) OS=Platanus acerifolia GN=plaa2 PE=1 SV=1	gi|645260622|ref|XP_008235914.1|:PREDICTED: exopolygalacturonase [Prunus mume]
evm.model.scaffold_117.509	GO:0004650; polygalacturonase activity; Molecular Function::GO:0005975; carbohydrate metabolic process; Biological Process	IPR000743; Glycoside hydrolase, family 28::IPR006626; Parallel beta-helix repeat	exopolygalacturonase; K01213 galacturan 1,4-alpha-galacturonidase [EC:3.2.1.67] (A)	Exopolygalacturonase (Fragment) OS=Platanus acerifolia GN=plaa2 PE=1 SV=1	gi|645260622|ref|XP_008235914.1|:PREDICTED: exopolygalacturonase [Prunus mume]
evm.model.scaffold_118.506	GO:0008152; metabolic process; Biological Process::GO:0016758; transferase activity, transferring hexosyl groups; Molecular Function	IPR002213; UDP-glucuronosyl/UDP-glucosyltransferase	SORBIDRAFT_01g001220, Sb01g001220; hypothetical protein; K13030 cyanohydrin beta-glucosyltransferase [EC:2.4.1.85] (A)	7-deoxyloganetin glucosyltransferase OS=Gardenia jasminoides GN=UGT85A24 PE=1 SV=1	gi|590688343|ref|XP_007042920.1|:UDP-glucosyl transferase 85A2 [Theobroma cacao]
evm.model.scaffold_118.507	GO:0008152; metabolic process; Biological Process::GO:0016758; transferase activity, transferring hexosyl groups; Molecular Function	IPR002213; UDP-glucuronosyl/UDP-glucosyltransferase	cyanohydrin beta-glucosyltransferase-like; K13030 cyanohydrin beta-glucosyltransferase [EC:2.4.1.85] (A)	7-deoxyloganetin glucosyltransferase OS=Gardenia jasminoides GN=UGT85A24 PE=1 SV=1	gi|590688343|ref|XP_007042920.1|:UDP-glucosyl transferase 85A2 [Theobroma cacao]
evm.model.scaffold_1185.2	GO:0016747; transferase activity, transferring acyl groups other than amino-acyl groups; Molecular Function	IPR003480; Transferase	shikimate O-hydroxycinnamoyltransferase-like; K13065 shikimate O-hydroxycinnamoyltransferase [EC:2.3.1.133] (A)	Shikimate O-hydroxycinnamoyltransferase OS=Nicotiana tabacum GN=HST PE=1 SV=1	gi|720030474|ref|XP_010265527.1|:PREDICTED: shikimate O-hydroxycinnamoyltransferase-like [Nelumbo nucifera]
evm.model.scaffold_1185.4	GO:0016747; transferase activity, transferring acyl groups other than amino-acyl groups; Molecular Function	IPR003480; Transferase	shikimate O-hydroxycinnamoyltransferase-like; K13065 shikimate O-hydroxycinnamoyltransferase [EC:2.3.1.133] (A)	Shikimate O-hydroxycinnamoyltransferase OS=Nicotiana tabacum GN=HST PE=1 SV=1	gi|720030474|ref|XP_010265527.1|:PREDICTED: shikimate O-hydroxycinnamoyltransferase-like [Nelumbo nucifera]
evm.model.scaffold_1195.1	NA	IPR007573; Protein of unknown function DUF566	NA	Protein ENDOSPERM DEFECTIVE 1 OS=Arabidopsis thaliana GN=EDE1 PE=1 SV=1	gi|694399365|ref|XP_009374811.1|:PREDICTED: protein ENDOSPERM DEFECTIVE 1-like [Pyrus x bretschneideri]
evm.model.scaffold_120.129	GO:0000166; nucleotide binding; Molecular Function::GO:0005516; calmodulin binding; Molecular Function::GO:0006812; cation transport; Biological Process::GO:0016021; integral to membrane; Cellular Component::GO:0019829; cation-transporting ATPase activity; Molecular Function::GO:0046872; metal ion binding; Molecular Function	IPR001757; Cation-transporting P-type ATPase::IPR004014; Cation-transporting P-type ATPase, N-terminal::IPR006068; Cation-transporting P-type ATPase, C-terminal::IPR008250; P-type ATPase, A domain::IPR023214; HAD-like domain::IPR024750; Calcium-transporting P-type ATPase, N-terminal autoinhibitory domain	probable calcium-transporting ATPase 5, plasma membrane-type; K01537 Ca2+-transporting ATPase [EC:3.6.3.8] (A)	Probable calcium-transporting ATPase 4, plasma membrane-type OS=Oryza sativa subsp. japonica GN=Os12g0136900 PE=3 SV=1	gi|743786712|ref|XP_010922239.1|:PREDICTED: probable calcium-transporting ATPase 5, plasma membrane-type isoform X1 [Elaeis guineensis]
evm.model.scaffold_1205.1	GO:0005506; iron ion binding; Molecular Function::GO:0009055; electron carrier activity; Molecular Function::GO:0016705; oxidoreductase activity, acting on paired donors, with incorporation or reduction of molecular oxygen; Molecular Function::GO:0020037; heme binding; Molecular Function::GO:0055114; oxidation-reduction process; Biological Process	IPR001128; Cytochrome P450::IPR002401; Cytochrome P450, E-class, group I	CYP71B34; K00517 [EC:1.14.-.-] (A)	Cytochrome P450 71A1 OS=Persea americana GN=CYP71A1 PE=1 SV=2	gi|743765342|ref|XP_010912890.1|:PREDICTED: cytochrome P450 71A9-like [Elaeis guineensis]
evm.model.scaffold_12.196	GO:0005506; iron ion binding; Molecular Function::GO:0005515; protein binding; Molecular Function::GO:0016165; lipoxygenase activity; Molecular Function::GO:0016702; oxidoreductase activity, acting on single donors with incorporation of molecular oxygen, incorporation of two atoms of oxygen; Molecular Function::GO:0046872; metal ion binding; Molecular Function::GO:0055114; oxidation-reduction pro…	IPR000907; Lipoxygenase::IPR001024; PLAT/LH2 domain::IPR001246; Lipoxygenase, plant::IPR013819; Lipoxygenase, C-terminal	probable linoleate 9S-lipoxygenase 4; K15718 linoleate 9S-lipoxygenase [EC:1.13.11.58] (A)	Probable linoleate 9S-lipoxygenase 5 OS=Solanum tuberosum GN=LOX1.5 PE=2 SV=1	gi|4056403|gb|AAD09861.1|:lipoxygenase [Persea americana]
evm.model.scaffold_12.199	GO:0005506; iron ion binding; Molecular Function::GO:0005515; protein binding; Molecular Function::GO:0016165; lipoxygenase activity; Molecular Function::GO:0016702; oxidoreductase activity, acting on single donors with incorporation of molecular oxygen, incorporation of two atoms of oxygen; Molecular Function::GO:0046872; metal ion binding; Molecular Function::GO:0055114; oxidation-reduction pro…	IPR000907; Lipoxygenase::IPR001024; PLAT/LH2 domain::IPR001246; Lipoxygenase, plant::IPR013819; Lipoxygenase, C-terminal	probable linoleate 9S-lipoxygenase 5; K15718 linoleate 9S-lipoxygenase [EC:1.13.11.58] (A)	Probable linoleate 9S-lipoxygenase 5 OS=Solanum tuberosum GN=LOX1.5 PE=2 SV=1	gi|4056403|gb|AAD09861.1|:lipoxygenase [Persea americana]
evm.model.scaffold_122.245	GO:0008152; metabolic process; Biological Process::GO:0016758; transferase activity, transferring hexosyl groups; Molecular Function	IPR002213; UDP-glucuronosyl/UDP-glucosyltransferase	SORBIDRAFT_01g001220, Sb01g001220; hypothetical protein; K13030 cyanohydrin beta-glucosyltransferase [EC:2.4.1.85] (A)	7-deoxyloganetin glucosyltransferase OS=Gardenia jasminoides GN=UGT85A24 PE=1 SV=1	gi|590688343|ref|XP_007042920.1|:UDP-glucosyl transferase 85A2 [Theobroma cacao]
evm.model.scaffold_122.248	GO:0008152; metabolic process; Biological Process::GO:0016758; transferase activity, transferring hexosyl groups; Molecular Function	IPR002213; UDP-glucuronosyl/UDP-glucosyltransferase	SORBIDRAFT_01g001220, Sb01g001220; hypothetical protein; K13030 cyanohydrin beta-glucosyltransferase [EC:2.4.1.85] (A)	7-deoxyloganetin glucosyltransferase OS=Gardenia jasminoides GN=UGT85A24 PE=1 SV=1	gi|590688343|ref|XP_007042920.1|:UDP-glucosyl transferase 85A2 [Theobroma cacao]
evm.model.scaffold_12.395	GO:0004650; polygalacturonase activity; Molecular Function::GO:0005975; carbohydrate metabolic process; Biological Process	IPR000743; Glycoside hydrolase, family 28::IPR006626; Parallel beta-helix repeat	exopolygalacturonase-like; K01213 galacturan 1,4-alpha-galacturonidase [EC:3.2.1.67] (A)	Exopolygalacturonase (Fragment) OS=Platanus acerifolia GN=plaa2 PE=1 SV=1	gi|720032947|ref|XP_010266273.1|:PREDICTED: exopolygalacturonase-like [Nelumbo nucifera]
evm.model.scaffold_130.204	GO:0004650; polygalacturonase activity; Molecular Function::GO:0005975; carbohydrate metabolic process; Biological Process	IPR000743; Glycoside hydrolase, family 28::IPR006626; Parallel beta-helix repeat	exopolygalacturonase-like; K01213 galacturan 1,4-alpha-galacturonidase [EC:3.2.1.67] (A)	Exopolygalacturonase (Fragment) OS=Platanus acerifolia GN=plaa2 PE=1 SV=1	gi|586769432|ref|XP_006856225.1|:PREDICTED: exopolygalacturonase [Amborella trichopoda]
evm.model.scaffold_131.110	GO:0008152; metabolic process; Biological Process::GO:0016758; transferase activity, transferring hexosyl groups; Molecular Function	IPR002213; UDP-glucuronosyl/UDP-glucosyltransferase	SORBIDRAFT_01g001220, Sb01g001220; hypothetical protein; K13030 cyanohydrin beta-glucosyltransferase [EC:2.4.1.85] (A)	7-deoxyloganetin glucosyltransferase OS=Gardenia jasminoides GN=UGT85A24 PE=1 SV=1	gi|590688343|ref|XP_007042920.1|:UDP-glucosyl transferase 85A2 [Theobroma cacao]
evm.model.scaffold_13.15	GO:0005515; protein binding; Molecular Function	IPR001611; Leucine-rich repeat::IPR003591; Leucine-rich repeat, typical subtype	systemin receptor SR160-like; K13415 protein brassinosteroid insensitive 1 [EC:2.7.10.1 2.7.11.1] (A)	Receptor-like protein kinase 2 OS=Arabidopsis thaliana GN=RCH2 PE=1 SV=1	gi|661895129|emb|CDP00934.1|:unnamed protein product [Coffea canephora]
evm.model.scaffold_13.20	GO:0005515; protein binding; Molecular Function	IPR001611; Leucine-rich repeat::IPR003591; Leucine-rich repeat, typical subtype::IPR013210; Leucine-rich repeat-containing N-terminal, type 2	probable LRR receptor-like serine/threonine-protein kinase At4g36180; K13466 EIX receptor 1/2 (A)	Protein BRASSINOSTEROID INSENSITIVE 1 OS=Arabidopsis thaliana GN=BRI1 PE=1 SV=1	gi|661895129|emb|CDP00934.1|:unnamed protein product [Coffea canephora]
evm.model.scaffold_141.189_evm.model.scaffold_141.190	GO:0016747; transferase activity, transferring acyl groups other than amino-acyl groups; Molecular Function	IPR003480; Transferase	shikimate O-hydroxycinnamoyltransferase-like; K13065 shikimate O-hydroxycinnamoyltransferase [EC:2.3.1.133] (A)	Shikimate O-hydroxycinnamoyltransferase OS=Nicotiana tabacum GN=HST PE=1 SV=1	gi|720030474|ref|XP_010265527.1|:PREDICTED: shikimate O-hydroxycinnamoyltransferase-like [Nelumbo nucifera]
evm.model.scaffold_141.191	GO:0016747; transferase activity, transferring acyl groups other than amino-acyl groups; Molecular Function	IPR003480; Transferase	Hydroxycinnamoyl-CoA shikimate/quinate hydroxycinnamoyl transferase, putative; K13065 shikimate O-hydroxycinnamoyltransferase [EC:2.3.1.133] (A)	Shikimate O-hydroxycinnamoyltransferase OS=Nicotiana tabacum GN=HST PE=1 SV=1	gi|763789509|gb|KJB56505.1|:hypothetical protein B456_009G122600 [Gossypium raimondii]
evm.model.scaffold_141.203.1	GO:0000287; magnesium ion binding; Molecular Function::GO:0008152; metabolic process; Biological Process::GO:0010333; terpene synthase activity; Molecular Function::GO:0016829; lyase activity; Molecular Function	IPR001906; Terpene synthase, N-terminal domain::IPR005630; Terpene synthase, metal-binding domain	(-)-a-terpineol synthase (EC:4.2.3.111); K18108 (-)-alpha-terpineol synthase [EC:4.2.3.111] (A)	Alpha-terpineol synthase, chloroplastic OS=Magnolia grandiflora PE=1 SV=1	gi|720037990|ref|XP_010267843.1|:PREDICTED: alpha-terpineol synthase, chloroplastic-like [Nelumbo nucifera]
evm.model.scaffold_141.69	GO:0004553; hydrolase activity, hydrolyzing O-glycosyl compounds; Molecular Function::GO:0005975; carbohydrate metabolic process; Biological Process	IPR001360; Glycoside hydrolase, family 1	beta-glucosidase 40; K01188 beta-glucosidase [EC:3.2.1.21] (A)	Beta-glucosidase 40 OS=Arabidopsis thaliana GN=BGLU40 PE=2 SV=1	gi|557357620|dbj|BAO04176.1|:hypothetical protein [Delphinium grandiflorum]
evm.model.scaffold_147.9	GO:0000166; nucleotide binding; Molecular Function::GO:0006812; cation transport; Biological Process::GO:0016021; integral to membrane; Cellular Component::GO:0019829; cation-transporting ATPase activity; Molecular Function::GO:0046872; metal ion binding; Molecular Function	IPR001757; Cation-transporting P-type ATPase::IPR006068; Cation-transporting P-type ATPase, C-terminal::IPR008250; P-type ATPase, A domain::IPR023214; HAD-like domain	calcium-transporting ATPase 1, plasma membrane-type-like; K01537 Ca2+-transporting ATPase [EC:3.6.3.8] (A)	Calcium-transporting ATPase 1, plasma membrane-type OS=Oryza sativa subsp. japonica GN=Os12g0586600 PE=2 SV=1	gi|743846881|ref|XP_010938957.1|:PREDICTED: calcium-transporting ATPase 1, plasma membrane-type-like [Elaeis guineensis]
evm.model.scaffold_15.11	GO:0000166; nucleotide binding; Molecular Function::GO:0006812; cation transport; Biological Process::GO:0016021; integral to membrane; Cellular Component::GO:0019829; cation-transporting ATPase activity; Molecular Function::GO:0046872; metal ion binding; Molecular Function	IPR001757; Cation-transporting P-type ATPase::IPR004014; Cation-transporting P-type ATPase, N-terminal::IPR006068; Cation-transporting P-type ATPase, C-terminal::IPR008250; P-type ATPase, A domain::IPR023214; HAD-like domain	calcium-transporting ATPase 1, plasma membrane-type-like; K01537 Ca2+-transporting ATPase [EC:3.6.3.8] (A)	Calcium-transporting ATPase 1, plasma membrane-type OS=Oryza sativa subsp. japonica GN=Os12g0586600 PE=2 SV=1	gi|720098555|ref|XP_010247663.1|:PREDICTED: calcium-transporting ATPase 1, plasma membrane-type-like [Nelumbo nucifera]
evm.model.scaffold_153.19_evm.model.scaffold_153.16	GO:0000287; magnesium ion binding; Molecular Function::GO:0008152; metabolic process; Biological Process::GO:0010333; terpene synthase activity; Molecular Function::GO:0016829; lyase activity; Molecular Function	IPR001906; Terpene synthase, N-terminal domain::IPR005630; Terpene synthase, metal-binding domain	(-)-a-terpineol synthase (EC:4.2.3.111); K18108 (-)-alpha-terpineol synthase [EC:4.2.3.111] (A)	Alpha-terpineol synthase, chloroplastic OS=Magnolia grandiflora PE=1 SV=1	gi|410591616|sp|B3TPQ7.1|ATESY_MAGGA:RecName: Full=Alpha-terpineol synthase, chloroplastic; Short=Mg17; Flags: Precursor [Magnolia grandiflora]
evm.model.scaffold_153.38	GO:0005506; iron ion binding; Molecular Function::GO:0005515; protein binding; Molecular Function::GO:0016165; lipoxygenase activity; Molecular Function::GO:0016702; oxidoreductase activity, acting on single donors with incorporation of molecular oxygen, incorporation of two atoms of oxygen; Molecular Function::GO:0046872; metal ion binding; Molecular Function::GO:0055114; oxidation-reduction pro…	IPR000907; Lipoxygenase::IPR001024; PLAT/LH2 domain::IPR001246; Lipoxygenase, plant::IPR013819; Lipoxygenase, C-terminal	lipoxygenase 6, chloroplastic; K00454 lipoxygenase [EC:1.13.11.12] (A)	Lipoxygenase 6, chloroplastic OS=Arabidopsis thaliana GN=LOX6 PE=2 SV=1	gi|719977636|ref|XP_010248907.1|:PREDICTED: lipoxygenase 6, chloroplastic [Nelumbo nucifera]
evm.model.scaffold_153.479	GO:0004650; polygalacturonase activity; Molecular Function::GO:0005975; carbohydrate metabolic process; Biological Process	IPR000743; Glycoside hydrolase, family 28::IPR006626; Parallel beta-helix repeat	exopolygalacturonase-like; K01213 galacturan 1,4-alpha-galacturonidase [EC:3.2.1.67] (A)	Exopolygalacturonase (Fragment) OS=Platanus acerifolia GN=plaa2 PE=1 SV=1	gi|586769432|ref|XP_006856225.1|:PREDICTED: exopolygalacturonase [Amborella trichopoda]
evm.model.scaffold_153.480	GO:0004650; polygalacturonase activity; Molecular Function::GO:0005975; carbohydrate metabolic process; Biological Process	IPR000743; Glycoside hydrolase, family 28::IPR006626; Parallel beta-helix repeat	exopolygalacturonase-like; K01213 galacturan 1,4-alpha-galacturonidase [EC:3.2.1.67] (A)	Exopolygalacturonase (Fragment) OS=Platanus acerifolia GN=plaa2 PE=1 SV=1	gi|586769432|ref|XP_006856225.1|:PREDICTED: exopolygalacturonase [Amborella trichopoda]
evm.model.scaffold_15.48	GO:0005515; protein binding; Molecular Function	IPR001611; Leucine-rich repeat::IPR003591; Leucine-rich repeat, typical subtype	probable LRR receptor-like serine/threonine-protein kinase At4g36180; K13466 EIX receptor 1/2 (A)	LRR receptor-like serine/threonine-protein kinase GSO1 OS=Arabidopsis thaliana GN=GSO1 PE=2 SV=1	gi|823254435|ref|XP_012459861.1|:PREDICTED: LRR receptor-like serine/threonine-protein kinase ERECTA [Gossypium raimondii]
evm.model.scaffold_15.63	GO:0005515; protein binding; Molecular Function	IPR001611; Leucine-rich repeat::IPR003591; Leucine-rich repeat, typical subtype::IPR025875; Leucine rich repeat 4	probable LRR receptor-like serine/threonine-protein kinase At4g36180; K13466 EIX receptor 1/2 (A)	Probable LRR receptor-like serine/threonine-protein kinase At4g36180 OS=Arabidopsis thaliana GN=At4g36180 PE=2 SV=1	gi|661895129|emb|CDP00934.1|:unnamed protein product [Coffea canephora]
evm.model.scaffold_15.70	GO:0005515; protein binding; Molecular Function	IPR001611; Leucine-rich repeat::IPR003591; Leucine-rich repeat, typical subtype::IPR013210; Leucine-rich repeat-containing N-terminal, type 2	probable LRR receptor-like serine/threonine-protein kinase At4g36180; K13466 EIX receptor 1/2 (A)	Receptor-like protein 12 OS=Arabidopsis thaliana GN=RLP12 PE=2 SV=2	gi|698476840|ref|XP_009785692.1|:PREDICTED: LRR receptor-like serine/threonine-protein kinase GSO1 isoform X1 [Nicotiana sylvestris]
evm.model.scaffold_165.6	GO:0000166; nucleotide binding; Molecular Function::GO:0005516; calmodulin binding; Molecular Function::GO:0006812; cation transport; Biological Process::GO:0016021; integral to membrane; Cellular Component::GO:0019829; cation-transporting ATPase activity; Molecular Function::GO:0046872; metal ion binding; Molecular Function	IPR001757; Cation-transporting P-type ATPase::IPR004014; Cation-transporting P-type ATPase, N-terminal::IPR008250; P-type ATPase, A domain::IPR024750; Calcium-transporting P-type ATPase, N-terminal autoinhibitory domain	calcium-transporting ATPase 8, plasma membrane-type; K01537 Ca2+-transporting ATPase [EC:3.6.3.8] (A)	Calcium-transporting ATPase 8, plasma membrane-type OS=Arabidopsis thaliana GN=ACA8 PE=1 SV=1	gi|672163335|ref|XP_008801513.1|:PREDICTED: calcium-transporting ATPase 8, plasma membrane-type isoform X2 [Phoenix dactylifera]
evm.model.scaffold_165.7	GO:0006812; cation transport; Biological Process::GO:0016021; integral to membrane; Cellular Component::GO:0019829; cation-transporting ATPase activity; Molecular Function	IPR001757; Cation-transporting P-type ATPase::IPR006068; Cation-transporting P-type ATPase, C-terminal::IPR023214; HAD-like domain	calcium-transporting ATPase 10, plasma membrane-type; K01537 Ca2+-transporting ATPase [EC:3.6.3.8] (A)	Calcium-transporting ATPase 10, plasma membrane-type OS=Arabidopsis thaliana GN=ACA10 PE=1 SV=2	gi|297735450|emb|CBI17890.3|:unnamed protein product [Vitis vinifera]
evm.model.scaffold_168.8	GO:0004672; protein kinase activity; Molecular Function::GO:0004713; protein tyrosine kinase activity; Molecular Function::GO:0005524; ATP binding; Molecular Function::GO:0006468; protein phosphorylation; Biological Process	IPR000719; Protein kinase domain::IPR002290; Serine/threonine- / dual specificity protein kinase, catalytic domain::IPR020635; Tyrosine-protein kinase, catalytic domain	probable receptor-like protein kinase At5g39030; K04730 interleukin-1 receptor-associated kinase 1 [EC:2.7.11.1] (A)	Glycerophosphodiester phosphodiesterase protein kinase domain-containing GDPDL2 OS=Arabidopsis thaliana GN=GDPDL2 PE=1 SV=1	gi|672198939|ref|XP_008777484.1|:PREDICTED: probable receptor-like protein kinase At5g39030, partial [Phoenix dactylifera]
evm.model.scaffold_179.152	GO:0005506; iron ion binding; Molecular Function::GO:0005515; protein binding; Molecular Function::GO:0016165; lipoxygenase activity; Molecular Function::GO:0016702; oxidoreductase activity, acting on single donors with incorporation of molecular oxygen, incorporation of two atoms of oxygen; Molecular Function::GO:0046872; metal ion binding; Molecular Function::GO:0055114; oxidation-reduction pro…	IPR000907; Lipoxygenase::IPR001024; PLAT/LH2 domain::IPR001246; Lipoxygenase, plant::IPR013819; Lipoxygenase, C-terminal	probable linoleate 9S-lipoxygenase 5; K15718 linoleate 9S-lipoxygenase [EC:1.13.11.58] (A)	Probable linoleate 9S-lipoxygenase 5 OS=Solanum tuberosum GN=LOX1.5 PE=2 SV=1	gi|720000365|ref|XP_010256003.1|:PREDICTED: probable linoleate 9S-lipoxygenase 5 [Nelumbo nucifera]
evm.model.scaffold_179.66	GO:0004553; hydrolase activity, hydrolyzing O-glycosyl compounds; Molecular Function::GO:0005975; carbohydrate metabolic process; Biological Process	IPR001360; Glycoside hydrolase, family 1	beta-glucosidase 13-like; K01188 beta-glucosidase [EC:3.2.1.21] (A)	Beta-glucosidase 24 OS=Oryza sativa subsp. japonica GN=BGLU24 PE=2 SV=1	gi|702278921|ref|XP_010044986.1|:PREDICTED: beta-glucosidase 13-like [Eucalyptus grandis]
evm.model.scaffold_18.187	GO:0000166; nucleotide binding; Molecular Function::GO:0006812; cation transport; Biological Process::GO:0016021; integral to membrane; Cellular Component::GO:0019829; cation-transporting ATPase activity; Molecular Function::GO:0046872; metal ion binding; Molecular Function	IPR001757; Cation-transporting P-type ATPase::IPR004014; Cation-transporting P-type ATPase, N-terminal::IPR006068; Cation-transporting P-type ATPase, C-terminal::IPR008250; P-type ATPase, A domain::IPR023214; HAD-like domain	putative calcium-transporting ATPase 13, plasma membrane-type-like; K01537 Ca2+-transporting ATPase [EC:3.6.3.8] (A)	Calcium-transporting ATPase 12, plasma membrane-type OS=Arabidopsis thaliana GN=ACA12 PE=2 SV=1	gi|568872643|ref|XP_006489476.1|:PREDICTED: putative calcium-transporting ATPase 13, plasma membrane-type-like [Citrus sinensis]
evm.model.scaffold_18.188	GO:0000166; nucleotide binding; Molecular Function::GO:0006812; cation transport; Biological Process::GO:0016021; integral to membrane; Cellular Component::GO:0019829; cation-transporting ATPase activity; Molecular Function::GO:0046872; metal ion binding; Molecular Function	IPR001757; Cation-transporting P-type ATPase::IPR004014; Cation-transporting P-type ATPase, N-terminal::IPR006068; Cation-transporting P-type ATPase, C-terminal::IPR008250; P-type ATPase, A domain::IPR023214; HAD-like domain	putative calcium-transporting ATPase 13, plasma membrane-type; K01537 Ca2+-transporting ATPase [EC:3.6.3.8] (A)	Calcium-transporting ATPase 12, plasma membrane-type OS=Arabidopsis thaliana GN=ACA12 PE=2 SV=1	gi|720010176|ref|XP_010259161.1|:PREDICTED: LOW QUALITY PROTEIN: putative calcium-transporting ATPase 13, plasma membrane-type [Nelumbo nucifera]
evm.model.scaffold_18.289	GO:0000166; nucleotide binding; Molecular Function::GO:0005516; calmodulin binding; Molecular Function::GO:0006812; cation transport; Biological Process::GO:0016021; integral to membrane; Cellular Component::GO:0019829; cation-transporting ATPase activity; Molecular Function::GO:0046872; metal ion binding; Molecular Function	IPR001757; Cation-transporting P-type ATPase::IPR004014; Cation-transporting P-type ATPase, N-terminal::IPR006068; Cation-transporting P-type ATPase, C-terminal::IPR008250; P-type ATPase, A domain::IPR023214; HAD-like domain::IPR024750; Calcium-transporting P-type ATPase, N-terminal autoinhibitory domain	calcium-transporting ATPase 1, plasma membrane-type-like; K01537 Ca2+-transporting ATPase [EC:3.6.3.8] (A)	Calcium-transporting ATPase 1, plasma membrane-type OS=Oryza sativa subsp. japonica GN=Os12g0586600 PE=2 SV=1	gi|720098555|ref|XP_010247663.1|:PREDICTED: calcium-transporting ATPase 1, plasma membrane-type-like [Nelumbo nucifera]
evm.model.scaffold_18.410	GO:0005506; iron ion binding; Molecular Function::GO:0005515; protein binding; Molecular Function::GO:0016165; lipoxygenase activity; Molecular Function::GO:0016702; oxidoreductase activity, acting on single donors with incorporation of molecular oxygen, incorporation of two atoms of oxygen; Molecular Function::GO:0046872; metal ion binding; Molecular Function::GO:0055114; oxidation-reduction pro…	IPR000907; Lipoxygenase::IPR001024; PLAT/LH2 domain::IPR001246; Lipoxygenase, plant::IPR013819; Lipoxygenase, C-terminal	linoleate 13S-lipoxygenase 2-1, chloroplastic-like; K00454 lipoxygenase [EC:1.13.11.12] (A)	Linoleate 13S-lipoxygenase 2-1, chloroplastic OS=Solanum tuberosum GN=LOX2.1 PE=1 SV=1	gi|694327662|ref|XP_009354688.1|:PREDICTED: linoleate 13S-lipoxygenase 2-1, chloroplastic-like [Pyrus x bretschneideri]
evm.model.scaffold_18.413_evm.model.scaffold_18.408	GO:0005506; iron ion binding; Molecular Function::GO:0005515; protein binding; Molecular Function::GO:0016165; lipoxygenase activity; Molecular Function::GO:0016702; oxidoreductase activity, acting on single donors with incorporation of molecular oxygen, incorporation of two atoms of oxygen; Molecular Function::GO:0046872; metal ion binding; Molecular Function::GO:0055114; oxidation-reduction pro…	IPR000907; Lipoxygenase::IPR001024; PLAT/LH2 domain::IPR001246; Lipoxygenase, plant::IPR013819; Lipoxygenase, C-terminal	linoleate 13S-lipoxygenase 2-1, chloroplastic-like; K00454 lipoxygenase [EC:1.13.11.12] (A)	Linoleate 13S-lipoxygenase 2-1, chloroplastic OS=Solanum tuberosum GN=LOX2.1 PE=1 SV=1	gi|694327662|ref|XP_009354688.1|:PREDICTED: linoleate 13S-lipoxygenase 2-1, chloroplastic-like [Pyrus x bretschneideri]
evm.model.scaffold_18.484	GO:0005506; iron ion binding; Molecular Function::GO:0005515; protein binding; Molecular Function::GO:0016165; lipoxygenase activity; Molecular Function::GO:0016702; oxidoreductase activity, acting on single donors with incorporation of molecular oxygen, incorporation of two atoms of oxygen; Molecular Function::GO:0046872; metal ion binding; Molecular Function::GO:0055114; oxidation-reduction pro…	IPR000907; Lipoxygenase::IPR001024; PLAT/LH2 domain::IPR001246; Lipoxygenase, plant::IPR013819; Lipoxygenase, C-terminal	probable linoleate 9S-lipoxygenase 4; K15718 linoleate 9S-lipoxygenase [EC:1.13.11.58] (A)	Linoleate 9S-lipoxygenase 1 OS=Arabidopsis thaliana GN=LOX1 PE=1 SV=1	gi|4056403|gb|AAD09861.1|:lipoxygenase [Persea americana]
evm.model.scaffold_18.485	GO:0016702; oxidoreductase activity, acting on single donors with incorporation of molecular oxygen, incorporation of two atoms of oxygen; Molecular Function::GO:0046872; metal ion binding; Molecular Function::GO:0055114; oxidation-reduction process; Biological Process	IPR000907; Lipoxygenase::IPR013819; Lipoxygenase, C-terminal	probable linoleate 9S-lipoxygenase 5; K15718 linoleate 9S-lipoxygenase [EC:1.13.11.58] (A)	Probable linoleate 9S-lipoxygenase 5 OS=Solanum tuberosum GN=LOX1.5 PE=2 SV=1	gi|720000365|ref|XP_010256003.1|:PREDICTED: probable linoleate 9S-lipoxygenase 5 [Nelumbo nucifera]
evm.model.scaffold_18.488	GO:0005506; iron ion binding; Molecular Function::GO:0016165; lipoxygenase activity; Molecular Function::GO:0016702; oxidoreductase activity, acting on single donors with incorporation of molecular oxygen, incorporation of two atoms of oxygen; Molecular Function::GO:0046872; metal ion binding; Molecular Function::GO:0055114; oxidation-reduction process; Biological Process	IPR000907; Lipoxygenase::IPR001246; Lipoxygenase, plant::IPR013819; Lipoxygenase, C-terminal	probable linoleate 9S-lipoxygenase 5; K15718 linoleate 9S-lipoxygenase [EC:1.13.11.58] (A)	Linoleate 9S-lipoxygenase 6 (Fragment) OS=Solanum tuberosum GN=LOX1.6 PE=1 SV=1	gi|720000365|ref|XP_010256003.1|:PREDICTED: probable linoleate 9S-lipoxygenase 5 [Nelumbo nucifera]
evm.model.scaffold_24.7	GO:0004553; hydrolase activity, hydrolyzing O-glycosyl compounds; Molecular Function::GO:0005975; carbohydrate metabolic process; Biological Process	IPR001360; Glycoside hydrolase, family 1	beta-glucosidase 12-like; K01188 beta-glucosidase [EC:3.2.1.21] (A)	Beta-glucosidase 12 OS=Oryza sativa subsp. japonica GN=BGLU12 PE=2 SV=2	gi|802744289|ref|XP_012087445.1|:PREDICTED: beta-glucosidase 12-like [Jatropha curcas]
evm.model.scaffold_312.11	GO:0005515; protein binding; Molecular Function	IPR001611; Leucine-rich repeat::IPR003591; Leucine-rich repeat, typical subtype	probable LRR receptor-like serine/threonine-protein kinase At4g36180; K13466 EIX receptor 1/2 (A)	LRR receptor-like serine/threonine-protein kinase GSO2 OS=Arabidopsis thaliana GN=GSO2 PE=2 SV=2	gi|720046248|ref|XP_010270448.1|:PREDICTED: LRR receptor-like serine/threonine-protein kinase ERECTA [Nelumbo nucifera]
evm.model.scaffold_33.170	GO:0008270; zinc ion binding; Molecular Function::GO:0016491; oxidoreductase activity; Molecular Function::GO:0016747; transferase activity, transferring acyl groups other than amino-acyl groups; Molecular Function::GO:0055114; oxidation-reduction process; Biological Process	IPR002085; Alcohol dehydrogenase superfamily, zinc-type::IPR013149; Alcohol dehydrogenase, C-terminal::IPR013154; Alcohol dehydrogenase GroES-like::IPR020843; Polyketide synthase, enoylreductase	probable mannitol dehydrogenase; K00083 cinnamyl-alcohol dehydrogenase [EC:1.1.1.195] (A)	Probable mannitol dehydrogenase OS=Mesembryanthemum crystallinum GN=ELI3 PE=2 SV=1	gi|359497139|ref|XP_003635435.1|:PREDICTED: probable mannitol dehydrogenase [Vitis vinifera]
evm.model.scaffold_33.36	GO:0008270; zinc ion binding; Molecular Function::GO:0016491; oxidoreductase activity; Molecular Function::GO:0016747; transferase activity, transferring acyl groups other than amino-acyl groups; Molecular Function::GO:0055114; oxidation-reduction process; Biological Process	IPR002085; Alcohol dehydrogenase superfamily, zinc-type::IPR013149; Alcohol dehydrogenase, C-terminal::IPR013154; Alcohol dehydrogenase GroES-like::IPR020843; Polyketide synthase, enoylreductase	probable mannitol dehydrogenase; K00083 cinnamyl-alcohol dehydrogenase [EC:1.1.1.195] (A)	Probable mannitol dehydrogenase OS=Mesembryanthemum crystallinum GN=ELI3 PE=2 SV=1	gi|359497139|ref|XP_003635435.1|:PREDICTED: probable mannitol dehydrogenase [Vitis vinifera]
evm.model.scaffold_37.207	GO:0004650; polygalacturonase activity; Molecular Function::GO:0005975; carbohydrate metabolic process; Biological Process	IPR000743; Glycoside hydrolase, family 28::IPR006626; Parallel beta-helix repeat	POPTRDRAFT_875430; hypothetical protein; K01213 galacturan 1,4-alpha-galacturonidase [EC:3.2.1.67] (A)	Exopolygalacturonase (Fragment) OS=Platanus acerifolia GN=plaa2 PE=1 SV=1	gi|566188406|ref|XP_002312795.2|:hypothetical protein POPTR_0009s17010g [Populus trichocarpa]
evm.model.scaffold_384.2	GO:0005506; iron ion binding; Molecular Function::GO:0009055; electron carrier activity; Molecular Function::GO:0016705; oxidoreductase activity, acting on paired donors, with incorporation or reduction of molecular oxygen; Molecular Function::GO:0020037; heme binding; Molecular Function::GO:0055114; oxidation-reduction process; Biological Process	IPR001128; Cytochrome P450::IPR002401; Cytochrome P450, E-class, group I	cytochrome P450 71B36-like; K00512 steroid 17alpha-monooxygenase / 17alpha-hydroxyprogesterone aldolase [EC:1.14.14.19 4.1.2.30] (A)	Cytochrome P450 71B34 OS=Arabidopsis thaliana GN=CYP71B34 PE=2 SV=1	gi|743891795|ref|XP_010911404.1|:PREDICTED: cytochrome P450 71A1-like [Elaeis guineensis]
evm.model.scaffold_438.12	GO:0005515; protein binding; Molecular Function	IPR001611; Leucine-rich repeat::IPR003591; Leucine-rich repeat, typical subtype::IPR025875; Leucine rich repeat 4	probable LRR receptor-like serine/threonine-protein kinase At4g36180; K13466 EIX receptor 1/2 (A)	LRR receptor-like serine/threonine-protein kinase GSO1 OS=Arabidopsis thaliana GN=GSO1 PE=2 SV=1	gi|698476840|ref|XP_009785692.1|:PREDICTED: LRR receptor-like serine/threonine-protein kinase GSO1 isoform X1 [Nicotiana sylvestris]
evm.model.scaffold_438.15	GO:0005515; protein binding; Molecular Function	IPR001611; Leucine-rich repeat::IPR003591; Leucine-rich repeat, typical subtype::IPR025875; Leucine rich repeat 4	probable LRR receptor-like serine/threonine-protein kinase At4g36180; K13466 EIX receptor 1/2 (A)	LRR receptor-like serine/threonine-protein kinase GSO1 OS=Arabidopsis thaliana GN=GSO1 PE=2 SV=1	gi|720046248|ref|XP_010270448.1|:PREDICTED: LRR receptor-like serine/threonine-protein kinase ERECTA [Nelumbo nucifera]
evm.model.scaffold_438.18	GO:0005515; protein binding; Molecular Function	IPR001611; Leucine-rich repeat::IPR003591; Leucine-rich repeat, typical subtype	Di-glucose binding protein with Kinesin motor domain; K10406 kinesin family member C2/C3 (A)	LRR receptor-like serine/threonine-protein kinase GSO2 OS=Arabidopsis thaliana GN=GSO2 PE=2 SV=2	gi|720046248|ref|XP_010270448.1|:PREDICTED: LRR receptor-like serine/threonine-protein kinase ERECTA [Nelumbo nucifera]
evm.model.scaffold_438.5	GO:0005515; protein binding; Molecular Function	IPR001611; Leucine-rich repeat::IPR003591; Leucine-rich repeat, typical subtype::IPR025875; Leucine rich repeat 4	probable LRR receptor-like serine/threonine-protein kinase At4g36180; K13466 EIX receptor 1/2 (A)	LRR receptor-like serine/threonine-protein kinase FLS2 OS=Arabidopsis thaliana GN=FLS2 PE=1 SV=1	gi|720046248|ref|XP_010270448.1|:PREDICTED: LRR receptor-like serine/threonine-protein kinase ERECTA [Nelumbo nucifera]
evm.model.scaffold_438.9	GO:0005515; protein binding; Molecular Function	IPR001611; Leucine-rich repeat::IPR003591; Leucine-rich repeat, typical subtype::IPR025875; Leucine rich repeat 4	probable LRR receptor-like serine/threonine-protein kinase At4g36180; K13466 EIX receptor 1/2 (A)	LRR receptor-like serine/threonine-protein kinase GSO2 OS=Arabidopsis thaliana GN=GSO2 PE=2 SV=2	gi|720046248|ref|XP_010270448.1|:PREDICTED: LRR receptor-like serine/threonine-protein kinase ERECTA [Nelumbo nucifera]
evm.model.scaffold_471.3	GO:0005515; protein binding; Molecular Function	IPR001611; Leucine-rich repeat::IPR003591; Leucine-rich repeat, typical subtype::IPR025875; Leucine rich repeat 4	probable LRR receptor-like serine/threonine-protein kinase At4g36180; K13466 EIX receptor 1/2 (A)	LRR receptor-like serine/threonine-protein kinase GSO2 OS=Arabidopsis thaliana GN=GSO2 PE=2 SV=2	gi|720046248|ref|XP_010270448.1|:PREDICTED: LRR receptor-like serine/threonine-protein kinase ERECTA [Nelumbo nucifera]
evm.model.scaffold_47.210	GO:0000166; nucleotide binding; Molecular Function::GO:0005516; calmodulin binding; Molecular Function::GO:0006812; cation transport; Biological Process::GO:0016021; integral to membrane; Cellular Component::GO:0019829; cation-transporting ATPase activity; Molecular Function::GO:0046872; metal ion binding; Molecular Function	IPR001757; Cation-transporting P-type ATPase::IPR004014; Cation-transporting P-type ATPase, N-terminal::IPR006068; Cation-transporting P-type ATPase, C-terminal::IPR008250; P-type ATPase, A domain::IPR023214; HAD-like domain::IPR024750; Calcium-transporting P-type ATPase, N-terminal autoinhibitory domain	putative calcium-transporting ATPase 11, plasma membrane-type; K01537 Ca2+-transporting ATPase [EC:3.6.3.8] (A)	Putative calcium-transporting ATPase 11, plasma membrane-type OS=Arabidopsis thaliana GN=ACA11 PE=1 SV=1	gi|225449945|ref|XP_002270669.1|:PREDICTED: putative calcium-transporting ATPase 11, plasma membrane-type [Vitis vinifera]
evm.model.scaffold_482.11	NA	NA	NA	NA	gi|703137890|ref|XP_010106597.1|:hypothetical protein L484_002552 [Morus notabilis]
evm.model.scaffold_482.6	NA	NA	NA	NA	gi|703137890|ref|XP_010106597.1|:hypothetical protein L484_002552 [Morus notabilis]
evm.model.scaffold_49.34	NA	NA	NA	NA	gi|657370992|gb|KEH17023.1|:senescence-associated protein, putative [Medicago truncatula]
evm.model.scaffold_52.186	GO:0005506; iron ion binding; Molecular Function::GO:0005515; protein binding; Molecular Function::GO:0016165; lipoxygenase activity; Molecular Function::GO:0016702; oxidoreductase activity, acting on single donors with incorporation of molecular oxygen, incorporation of two atoms of oxygen; Molecular Function::GO:0046872; metal ion binding; Molecular Function::GO:0055114; oxidation-reduction pro…	IPR000907; Lipoxygenase::IPR001024; PLAT/LH2 domain::IPR001246; Lipoxygenase, plant::IPR013819; Lipoxygenase, C-terminal	linoleate 13S-lipoxygenase 3-1, chloroplastic-like; K00454 lipoxygenase [EC:1.13.11.12] (A)	Linoleate 13S-lipoxygenase 3-1, chloroplastic OS=Solanum tuberosum GN=LOX3.1 PE=1 SV=1	gi|720056988|ref|XP_010273845.1|:PREDICTED: linoleate 13S-lipoxygenase 3-1, chloroplastic-like [Nelumbo nucifera]
evm.model.scaffold_55.276	GO:0008152; metabolic process; Biological Process::GO:0016758; transferase activity, transferring hexosyl groups; Molecular Function	IPR002213; UDP-glucuronosyl/UDP-glucosyltransferase	SORBIDRAFT_01g001220, Sb01g001220; hypothetical protein; K13030 cyanohydrin beta-glucosyltransferase [EC:2.4.1.85] (A)	7-deoxyloganetin glucosyltransferase OS=Gardenia jasminoides GN=UGT85A24 PE=1 SV=1	gi|590688343|ref|XP_007042920.1|:UDP-glucosyl transferase 85A2 [Theobroma cacao]
evm.model.scaffold_55.56	GO:0008270; zinc ion binding; Molecular Function::GO:0016491; oxidoreductase activity; Molecular Function::GO:0016747; transferase activity, transferring acyl groups other than amino-acyl groups; Molecular Function::GO:0055114; oxidation-reduction process; Biological Process	IPR002085; Alcohol dehydrogenase superfamily, zinc-type::IPR013149; Alcohol dehydrogenase, C-terminal::IPR013154; Alcohol dehydrogenase GroES-like::IPR020843; Polyketide synthase, enoylreductase	probable mannitol dehydrogenase; K00083 cinnamyl-alcohol dehydrogenase [EC:1.1.1.195] (A)	Probable mannitol dehydrogenase OS=Fragaria ananassa GN=CAD PE=2 SV=1	gi|720089276|ref|XP_010244709.1|:PREDICTED: probable mannitol dehydrogenase [Nelumbo nucifera]
evm.model.scaffold_55.57	GO:0008270; zinc ion binding; Molecular Function::GO:0016491; oxidoreductase activity; Molecular Function::GO:0016747; transferase activity, transferring acyl groups other than amino-acyl groups; Molecular Function::GO:0055114; oxidation-reduction process; Biological Process	IPR002085; Alcohol dehydrogenase superfamily, zinc-type::IPR013149; Alcohol dehydrogenase, C-terminal::IPR013154; Alcohol dehydrogenase GroES-like::IPR020843; Polyketide synthase, enoylreductase	probable mannitol dehydrogenase; K00083 cinnamyl-alcohol dehydrogenase [EC:1.1.1.195] (A)	Probable mannitol dehydrogenase OS=Fragaria ananassa GN=CAD PE=2 SV=1	gi|359497139|ref|XP_003635435.1|:PREDICTED: probable mannitol dehydrogenase [Vitis vinifera]
evm.model.scaffold_55.58	GO:0008270; zinc ion binding; Molecular Function::GO:0016491; oxidoreductase activity; Molecular Function::GO:0016747; transferase activity, transferring acyl groups other than amino-acyl groups; Molecular Function::GO:0055114; oxidation-reduction process; Biological Process	IPR002085; Alcohol dehydrogenase superfamily, zinc-type::IPR013149; Alcohol dehydrogenase, C-terminal::IPR013154; Alcohol dehydrogenase GroES-like::IPR020843; Polyketide synthase, enoylreductase	probable mannitol dehydrogenase; K00083 cinnamyl-alcohol dehydrogenase [EC:1.1.1.195] (A)	Probable mannitol dehydrogenase OS=Fragaria ananassa GN=CAD PE=2 SV=1	gi|720089276|ref|XP_010244709.1|:PREDICTED: probable mannitol dehydrogenase [Nelumbo nucifera]
evm.model.scaffold_596.101	GO:0005515; protein binding; Molecular Function	IPR001611; Leucine-rich repeat::IPR003591; Leucine-rich repeat, typical subtype::IPR025875; Leucine rich repeat 4	probable LRR receptor-like serine/threonine-protein kinase At4g36180; K13466 EIX receptor 1/2 (A)	LRR receptor-like serine/threonine-protein kinase GSO2 OS=Arabidopsis thaliana GN=GSO2 PE=2 SV=2	gi|698476840|ref|XP_009785692.1|:PREDICTED: LRR receptor-like serine/threonine-protein kinase GSO1 isoform X1 [Nicotiana sylvestris]
evm.model.scaffold_596.29	GO:0004146; dihydrofolate reductase activity; Molecular Function::GO:0004553; hydrolase activity, hydrolyzing O-glycosyl compounds; Molecular Function::GO:0005975; carbohydrate metabolic process; Biological Process::GO:0006545; glycine biosynthetic process; Biological Process::GO:0009165; nucleotide biosynthetic process; Biological Process::GO:0055114; oxidation-reduction process; Biological Proc…	IPR001360; Glycoside hydrolase, family 1::IPR001796; Dihydrofolate reductase domain	beta-glucosidase 12-like; K01188 beta-glucosidase [EC:3.2.1.21] (A)	Beta-glucosidase 12 OS=Oryza sativa subsp. japonica GN=BGLU12 PE=2 SV=2	gi|743862524|ref|XP_010943555.1|:PREDICTED: beta-glucosidase 12-like isoform X1 [Elaeis guineensis]
evm.model.scaffold_5.97	GO:0016747; transferase activity, transferring acyl groups other than amino-acyl groups; Molecular Function	IPR003480; Transferase	shikimate O-hydroxycinnamoyltransferase-like; K13065 shikimate O-hydroxycinnamoyltransferase [EC:2.3.1.133] (A)	Shikimate O-hydroxycinnamoyltransferase OS=Nicotiana tabacum GN=HST PE=1 SV=1	gi|720030474|ref|XP_010265527.1|:PREDICTED: shikimate O-hydroxycinnamoyltransferase-like [Nelumbo nucifera]
evm.model.scaffold_634.2	GO:0004650; polygalacturonase activity; Molecular Function::GO:0005975; carbohydrate metabolic process; Biological Process	IPR000743; Glycoside hydrolase, family 28::IPR006626; Parallel beta-helix repeat	exopolygalacturonase-like; K01213 galacturan 1,4-alpha-galacturonidase [EC:3.2.1.67] (A)	Exopolygalacturonase (Fragment) OS=Platanus acerifolia GN=plaa2 PE=1 SV=1	gi|586769432|ref|XP_006856225.1|:PREDICTED: exopolygalacturonase [Amborella trichopoda]
evm.model.scaffold_662.3	GO:0000287; magnesium ion binding; Molecular Function::GO:0008152; metabolic process; Biological Process::GO:0010333; terpene synthase activity; Molecular Function::GO:0016829; lyase activity; Molecular Function	IPR001906; Terpene synthase, N-terminal domain::IPR005630; Terpene synthase, metal-binding domain	(-)-a-terpineol synthase (EC:4.2.3.111); K18108 (-)-alpha-terpineol synthase [EC:4.2.3.111] (A)	Alpha-terpineol synthase, chloroplastic OS=Magnolia grandiflora PE=1 SV=1	gi|410591616|sp|B3TPQ7.1|ATESY_MAGGA:RecName: Full=Alpha-terpineol synthase, chloroplastic; Short=Mg17; Flags: Precursor [Magnolia grandiflora]
evm.model.scaffold_694.4.1	GO:0000287; magnesium ion binding; Molecular Function::GO:0008152; metabolic process; Biological Process::GO:0010333; terpene synthase activity; Molecular Function::GO:0016829; lyase activity; Molecular Function	IPR001906; Terpene synthase, N-terminal domain::IPR005630; Terpene synthase, metal-binding domain	(E)-beta-caryophyllene synthase; K15803 (-)-germacrene D synthase [EC:4.2.3.22 4.2.3.75] (A)	Beta-cubebene synthase OS=Magnolia grandiflora PE=1 SV=1	gi|881976353|gb|AKQ19357.1|:terpene synthase 1 [Laurus nobilis]
evm.model.scaffold_70.131	GO:0000166; nucleotide binding; Molecular Function::GO:0005524; ATP binding; Molecular Function::GO:0016020; membrane; Cellular Component::GO:0016887; ATPase activity; Molecular Function::GO:0017111; nucleoside-triphosphatase activity; Molecular Function	IPR003439; ABC transporter-like::IPR003593; AAA+ ATPase domain::IPR013525; ABC-2 type transporter::IPR013581; Plant PDR ABC transporter associated	hypothetical protein; K08711 ATP-binding cassette, subfamily G (WHITE), member 2, PDR (A)	ABC transporter G family member 32 OS=Arabidopsis thaliana GN=ABCG32 PE=1 SV=1	gi|147826852|emb|CAN75082.1|:hypothetical protein VITISV_027744 [Vitis vinifera]
evm.model.scaffold_70.306	GO:0000166; nucleotide binding; Molecular Function::GO:0005516; calmodulin binding; Molecular Function::GO:0006812; cation transport; Biological Process::GO:0016021; integral to membrane; Cellular Component::GO:0019829; cation-transporting ATPase activity; Molecular Function::GO:0046872; metal ion binding; Molecular Function	IPR001757; Cation-transporting P-type ATPase::IPR004014; Cation-transporting P-type ATPase, N-terminal::IPR006068; Cation-transporting P-type ATPase, C-terminal::IPR008250; P-type ATPase, A domain::IPR023214; HAD-like domain::IPR024750; Calcium-transporting P-type ATPase, N-terminal autoinhibitory domain	calcium-transporting ATPase 1, plasma membrane-type-like; K01537 Ca2+-transporting ATPase [EC:3.6.3.8] (A)	Calcium-transporting ATPase 1, plasma membrane-type OS=Oryza sativa subsp. japonica GN=Os12g0586600 PE=2 SV=1	gi|720098555|ref|XP_010247663.1|:PREDICTED: calcium-transporting ATPase 1, plasma membrane-type-like [Nelumbo nucifera]
evm.model.scaffold_70.415	GO:0004553; hydrolase activity, hydrolyzing O-glycosyl compounds; Molecular Function::GO:0005975; carbohydrate metabolic process; Biological Process	IPR001360; Glycoside hydrolase, family 1	beta-glucosidase 12-like; K01188 beta-glucosidase [EC:3.2.1.21] (A)	Beta-glucosidase 12 OS=Oryza sativa subsp. japonica GN=BGLU12 PE=2 SV=2	gi|720031546|ref|XP_010265850.1|:PREDICTED: beta-glucosidase 12-like [Nelumbo nucifera]
evm.model.scaffold_70.416	GO:0004553; hydrolase activity, hydrolyzing O-glycosyl compounds; Molecular Function::GO:0005975; carbohydrate metabolic process; Biological Process	IPR001360; Glycoside hydrolase, family 1	hypothetical protein; K01229 lactase-phlorizin hydrolase [EC:3.2.1.108 3.2.1.62] (A)	Lactase-phlorizin hydrolase OS=Homo sapiens GN=LCT PE=1 SV=3	gi|297746386|emb|CBI16442.3|:unnamed protein product [Vitis vinifera]
evm.model.scaffold_70.419	GO:0004553; hydrolase activity, hydrolyzing O-glycosyl compounds; Molecular Function::GO:0005975; carbohydrate metabolic process; Biological Process	IPR001360; Glycoside hydrolase, family 1	beta-glucosidase 12-like; K01188 beta-glucosidase [EC:3.2.1.21] (A)	Beta-glucosidase 24 OS=Oryza sativa subsp. japonica GN=BGLU24 PE=2 SV=1	gi|802744289|ref|XP_012087445.1|:PREDICTED: beta-glucosidase 12-like [Jatropha curcas]
evm.model.scaffold_70.420	GO:0004553; hydrolase activity, hydrolyzing O-glycosyl compounds; Molecular Function::GO:0005975; carbohydrate metabolic process; Biological Process	IPR001360; Glycoside hydrolase, family 1	SORBIDRAFT_10g012220, Sb10g012220; hypothetical protein; K01188 beta-glucosidase [EC:3.2.1.21] (A)	Beta-glucosidase 12 OS=Oryza sativa subsp. japonica GN=BGLU12 PE=2 SV=2	gi|242095670|ref|XP_002438325.1|:hypothetical protein SORBIDRAFT_10g012220 [Sorghum bicolor]
evm.model.scaffold_70.425	GO:0004553; hydrolase activity, hydrolyzing O-glycosyl compounds; Molecular Function::GO:0005975; carbohydrate metabolic process; Biological Process	IPR001360; Glycoside hydrolase, family 1	beta-glucosidase 12; K01188 beta-glucosidase [EC:3.2.1.21] (A)	Beta-glucosidase 12 OS=Oryza sativa subsp. japonica GN=BGLU12 PE=2 SV=2	gi|769805213|ref|XP_006850051.2|:PREDICTED: beta-glucosidase 12 [Amborella trichopoda]
evm.model.scaffold_70.492	GO:0005506; iron ion binding; Molecular Function::GO:0005515; protein binding; Molecular Function::GO:0016165; lipoxygenase activity; Molecular Function::GO:0016702; oxidoreductase activity, acting on single donors with incorporation of molecular oxygen, incorporation of two atoms of oxygen; Molecular Function::GO:0046872; metal ion binding; Molecular Function::GO:0055114; oxidation-reduction pro…	IPR000907; Lipoxygenase::IPR001024; PLAT/LH2 domain::IPR001246; Lipoxygenase, plant::IPR013819; Lipoxygenase, C-terminal	probable linoleate 9S-lipoxygenase 4; K15718 linoleate 9S-lipoxygenase [EC:1.13.11.58] (A)	Probable linoleate 9S-lipoxygenase 5 OS=Solanum tuberosum GN=LOX1.5 PE=2 SV=1	gi|4056403|gb|AAD09861.1|:lipoxygenase [Persea americana]
evm.model.scaffold_70.493	GO:0005506; iron ion binding; Molecular Function::GO:0005515; protein binding; Molecular Function::GO:0016165; lipoxygenase activity; Molecular Function::GO:0016702; oxidoreductase activity, acting on single donors with incorporation of molecular oxygen, incorporation of two atoms of oxygen; Molecular Function::GO:0046872; metal ion binding; Molecular Function::GO:0055114; oxidation-reduction pro…	IPR000907; Lipoxygenase::IPR001024; PLAT/LH2 domain::IPR001246; Lipoxygenase, plant::IPR013819; Lipoxygenase, C-terminal	probable linoleate 9S-lipoxygenase 5; K15718 linoleate 9S-lipoxygenase [EC:1.13.11.58] (A)	Probable linoleate 9S-lipoxygenase 5 OS=Solanum tuberosum GN=LOX1.5 PE=2 SV=1	gi|4056403|gb|AAD09861.1|:lipoxygenase [Persea americana]
evm.model.scaffold_731.18	GO:0000166; nucleotide binding; Molecular Function::GO:0005524; ATP binding; Molecular Function::GO:0016020; membrane; Cellular Component::GO:0016887; ATPase activity; Molecular Function::GO:0017111; nucleoside-triphosphatase activity; Molecular Function	IPR003439; ABC transporter-like::IPR003593; AAA+ ATPase domain::IPR013525; ABC-2 type transporter	pleiotropic drug resistance ABC transporter; K08712 ATP-binding cassette, subfamily G (WHITE), member 2, SNQ2 (A)	ABC transporter G family member 44 OS=Oryza sativa subsp. japonica GN=ABCG44 PE=2 SV=2	gi|719980811|ref|XP_010249928.1|:PREDICTED: putative pleiotropic drug resistance protein 7 [Nelumbo nucifera]
evm.model.scaffold_73.13	GO:0000166; nucleotide binding; Molecular Function::GO:0005516; calmodulin binding; Molecular Function::GO:0006812; cation transport; Biological Process::GO:0016021; integral to membrane; Cellular Component::GO:0019829; cation-transporting ATPase activity; Molecular Function::GO:0046872; metal ion binding; Molecular Function	IPR001757; Cation-transporting P-type ATPase::IPR004014; Cation-transporting P-type ATPase, N-terminal::IPR006068; Cation-transporting P-type ATPase, C-terminal::IPR008250; P-type ATPase, A domain::IPR023214; HAD-like domain::IPR024750; Calcium-transporting P-type ATPase, N-terminal autoinhibitory domain	calcium-transporting ATPase 1, plasma membrane-type-like; K01537 Ca2+-transporting ATPase [EC:3.6.3.8] (A)	Calcium-transporting ATPase 1, chloroplastic OS=Arabidopsis thaliana GN=ACA1 PE=1 SV=3	gi|743859656|ref|XP_010942805.1|:PREDICTED: calcium-transporting ATPase 1, plasma membrane-type-like isoform X3 [Elaeis guineensis]
evm.model.scaffold_742.206	GO:0004553; hydrolase activity, hydrolyzing O-glycosyl compounds; Molecular Function::GO:0005975; carbohydrate metabolic process; Biological Process	IPR001360; Glycoside hydrolase, family 1	beta-glucosidase 44-like; K05350 beta-glucosidase [EC:3.2.1.21] (A)	Beta-glucosidase 44 OS=Arabidopsis thaliana GN=BGLU44 PE=2 SV=1	gi|802573677|ref|XP_012068429.1|:PREDICTED: beta-glucosidase 44-like [Jatropha curcas]
evm.model.scaffold_752.66	GO:0016747; transferase activity, transferring acyl groups other than amino-acyl groups; Molecular Function	IPR003480; Transferase	shikimate O-hydroxycinnamoyltransferase-like; K13065 shikimate O-hydroxycinnamoyltransferase [EC:2.3.1.133] (A)	Shikimate O-hydroxycinnamoyltransferase OS=Nicotiana tabacum GN=HST PE=1 SV=1	gi|720030474|ref|XP_010265527.1|:PREDICTED: shikimate O-hydroxycinnamoyltransferase-like [Nelumbo nucifera]
evm.model.scaffold_759.1	GO:0000287; magnesium ion binding; Molecular Function::GO:0008152; metabolic process; Biological Process::GO:0010333; terpene synthase activity; Molecular Function::GO:0016829; lyase activity; Molecular Function	IPR001906; Terpene synthase, N-terminal domain::IPR005630; Terpene synthase, metal-binding domain	(-)-germacrene D synthase (EC:4.2.3.22 4.2.3.75); K15803 (-)-germacrene D synthase [EC:4.2.3.22 4.2.3.75] (A)	(-)-germacrene D synthase OS=Vitis vinifera GN=VIT_19s0014g04930 PE=1 SV=1	gi|213390006|gb|ACJ46048.1|:sesquiterpene synthase [Warburgia ugandensis]
evm.model.scaffold_797.27	GO:0000287; magnesium ion binding; Molecular Function::GO:0008152; metabolic process; Biological Process::GO:0010333; terpene synthase activity; Molecular Function::GO:0016829; lyase activity; Molecular Function	IPR001906; Terpene synthase, N-terminal domain::IPR005630; Terpene synthase, metal-binding domain	(-)-germacrene D synthase-like; K15803 (-)-germacrene D synthase [EC:4.2.3.22 4.2.3.75] (A)	Alpha-terpineol synthase, chloroplastic OS=Magnolia grandiflora PE=1 SV=1	gi|881976355|gb|AKQ19358.1|:terpene synthase 2 [Laurus nobilis]
evm.model.scaffold_797.29	GO:0004553; hydrolase activity, hydrolyzing O-glycosyl compounds; Molecular Function::GO:0005975; carbohydrate metabolic process; Biological Process	IPR001360; Glycoside hydrolase, family 1	putative beta-glucosidase 41-like; K01188 beta-glucosidase [EC:3.2.1.21] (A)	Putative beta-glucosidase 41 OS=Arabidopsis thaliana GN=BGLU41 PE=3 SV=2	gi|641855620|gb|KDO74406.1|:hypothetical protein CISIN_1g015181mg [Citrus sinensis]
evm.model.scaffold_801.35	GO:0000166; nucleotide binding; Molecular Function::GO:0005516; calmodulin binding; Molecular Function::GO:0006812; cation transport; Biological Process::GO:0016021; integral to membrane; Cellular Component::GO:0019829; cation-transporting ATPase activity; Molecular Function::GO:0046872; metal ion binding; Molecular Function	IPR001757; Cation-transporting P-type ATPase::IPR004014; Cation-transporting P-type ATPase, N-terminal::IPR006068; Cation-transporting P-type ATPase, C-terminal::IPR008250; P-type ATPase, A domain::IPR023214; HAD-like domain::IPR024750; Calcium-transporting P-type ATPase, N-terminal autoinhibitory domain	calcium-transporting ATPase 8, plasma membrane-type-like; K01537 Ca2+-transporting ATPase [EC:3.6.3.8] (A)	Calcium-transporting ATPase 8, plasma membrane-type OS=Arabidopsis thaliana GN=ACA8 PE=1 SV=1	gi|743766946|ref|XP_010913719.1|:PREDICTED: calcium-transporting ATPase 8, plasma membrane-type-like isoform X1 [Elaeis guineensis]
evm.model.scaffold_865.109	GO:0005506; iron ion binding; Molecular Function::GO:0005515; protein binding; Molecular Function::GO:0016165; lipoxygenase activity; Molecular Function::GO:0016702; oxidoreductase activity, acting on single donors with incorporation of molecular oxygen, incorporation of two atoms of oxygen; Molecular Function::GO:0046872; metal ion binding; Molecular Function::GO:0055114; oxidation-reduction pro…	IPR000907; Lipoxygenase::IPR001024; PLAT/LH2 domain::IPR001246; Lipoxygenase, plant::IPR013819; Lipoxygenase, C-terminal	lipoxygenase 6, chloroplastic; K00454 lipoxygenase [EC:1.13.11.12] (A)	Lipoxygenase 6, chloroplastic OS=Arabidopsis thaliana GN=LOX6 PE=2 SV=1	gi|719977636|ref|XP_010248907.1|:PREDICTED: lipoxygenase 6, chloroplastic [Nelumbo nucifera]
evm.model.scaffold_865.21	GO:0005506; iron ion binding; Molecular Function::GO:0009055; electron carrier activity; Molecular Function::GO:0016705; oxidoreductase activity, acting on paired donors, with incorporation or reduction of molecular oxygen; Molecular Function::GO:0020037; heme binding; Molecular Function::GO:0055114; oxidation-reduction process; Biological Process	IPR001128; Cytochrome P450::IPR002401; Cytochrome P450, E-class, group I	hypothetical protein; K00517 [EC:1.14.-.-] (A)	Cytochrome P450 71A1 OS=Persea americana GN=CYP71A1 PE=1 SV=2	gi|743765342|ref|XP_010912890.1|:PREDICTED: cytochrome P450 71A9-like [Elaeis guineensis]
evm.model.scaffold_909.1	GO:0008270; zinc ion binding; Molecular Function::GO:0016491; oxidoreductase activity; Molecular Function::GO:0016747; transferase activity, transferring acyl groups other than amino-acyl groups; Molecular Function::GO:0055114; oxidation-reduction process; Biological Process	IPR002085; Alcohol dehydrogenase superfamily, zinc-type::IPR013149; Alcohol dehydrogenase, C-terminal::IPR013154; Alcohol dehydrogenase GroES-like::IPR020843; Polyketide synthase, enoylreductase	probable mannitol dehydrogenase; K00083 cinnamyl-alcohol dehydrogenase [EC:1.1.1.195] (A)	Probable mannitol dehydrogenase OS=Fragaria ananassa GN=CAD PE=2 SV=1	gi|720089276|ref|XP_010244709.1|:PREDICTED: probable mannitol dehydrogenase [Nelumbo nucifera]
evm.model.scaffold_9.19_evm.model.scaffold_9.20	GO:0000166; nucleotide binding; Molecular Function::GO:0005516; calmodulin binding; Molecular Function::GO:0006812; cation transport; Biological Process::GO:0016021; integral to membrane; Cellular Component::GO:0019829; cation-transporting ATPase activity; Molecular Function::GO:0046872; metal ion binding; Molecular Function	IPR001757; Cation-transporting P-type ATPase::IPR004014; Cation-transporting P-type ATPase, N-terminal::IPR006068; Cation-transporting P-type ATPase, C-terminal::IPR008250; P-type ATPase, A domain::IPR023214; HAD-like domain::IPR024750; Calcium-transporting P-type ATPase, N-terminal autoinhibitory domain	calcium-transporting ATPase 1, plasma membrane-type-like; K01537 Ca2+-transporting ATPase [EC:3.6.3.8] (A)	Calcium-transporting ATPase 1, plasma membrane-type OS=Oryza sativa subsp. japonica GN=Os12g0586600 PE=2 SV=1	gi|720098555|ref|XP_010247663.1|:PREDICTED: calcium-transporting ATPase 1, plasma membrane-type-like [Nelumbo nucifera]
evm.model.scaffold_92.184	GO:0030247; polysaccharide binding; Molecular Function	IPR025287; Wall-associated receptor kinase galacturonan-binding domain	hypothetical protein; K04730 interleukin-1 receptor-associated kinase 1 [EC:2.7.11.1] (A)	NA	gi|566205485|ref|XP_002321441.2|:hypothetical protein POPTR_0015s02040g [Populus trichocarpa]
evm.model.scaffold_92.478	GO:0000166; nucleotide binding; Molecular Function::GO:0005516; calmodulin binding; Molecular Function::GO:0006812; cation transport; Biological Process::GO:0016021; integral to membrane; Cellular Component::GO:0019829; cation-transporting ATPase activity; Molecular Function::GO:0046872; metal ion binding; Molecular Function	IPR001757; Cation-transporting P-type ATPase::IPR004014; Cation-transporting P-type ATPase, N-terminal::IPR006068; Cation-transporting P-type ATPase, C-terminal::IPR008250; P-type ATPase, A domain::IPR023214; HAD-like domain::IPR024750; Calcium-transporting P-type ATPase, N-terminal autoinhibitory domain	putative calcium-transporting ATPase 11, plasma membrane-type; K01537 Ca2+-transporting ATPase [EC:3.6.3.8] (A)	Putative calcium-transporting ATPase 11, plasma membrane-type OS=Arabidopsis thaliana GN=ACA11 PE=1 SV=1	gi|225449945|ref|XP_002270669.1|:PREDICTED: putative calcium-transporting ATPase 11, plasma membrane-type [Vitis vinifera]
evm.model.scaffold_92.616	GO:0005506; iron ion binding; Molecular Function::GO:0009055; electron carrier activity; Molecular Function::GO:0016705; oxidoreductase activity, acting on paired donors, with incorporation or reduction of molecular oxygen; Molecular Function::GO:0020037; heme binding; Molecular Function::GO:0055114; oxidation-reduction process; Biological Process	IPR001128; Cytochrome P450::IPR002401; Cytochrome P450, E-class, group I	cytochrome P450 71B36-like; K00512 steroid 17alpha-monooxygenase / 17alpha-hydroxyprogesterone aldolase [EC:1.14.14.19 4.1.2.30] (A)	Cytochrome P450 71B34 OS=Arabidopsis thaliana GN=CYP71B34 PE=2 SV=1	gi|672127174|ref|XP_008787049.1|:PREDICTED: cytochrome P450 71A1-like [Phoenix dactylifera]
evm.model.scaffold_940.38	NA	NA	NA	NA	gi|703137890|ref|XP_010106597.1|:hypothetical protein L484_002552 [Morus notabilis]
evm.model.scaffold_96.702.1	GO:0016747; transferase activity, transferring acyl groups other than amino-acyl groups; Molecular Function	IPR003480; Transferase	shikimate O-hydroxycinnamoyltransferase-like; K13065 shikimate O-hydroxycinnamoyltransferase [EC:2.3.1.133] (A)	Shikimate O-hydroxycinnamoyltransferase OS=Nicotiana tabacum GN=HST PE=1 SV=1	gi|720030474|ref|XP_010265527.1|:PREDICTED: shikimate O-hydroxycinnamoyltransferase-like [Nelumbo nucifera]
evm.model.scaffold_96.804	GO:0000166; nucleotide binding; Molecular Function::GO:0005516; calmodulin binding; Molecular Function::GO:0006812; cation transport; Biological Process::GO:0016021; integral to membrane; Cellular Component::GO:0019829; cation-transporting ATPase activity; Molecular Function::GO:0046872; metal ion binding; Molecular Function	IPR001757; Cation-transporting P-type ATPase::IPR004014; Cation-transporting P-type ATPase, N-terminal::IPR006068; Cation-transporting P-type ATPase, C-terminal::IPR008250; P-type ATPase, A domain::IPR023214; HAD-like domain::IPR024750; Calcium-transporting P-type ATPase, N-terminal autoinhibitory domain	cation-transporting atpase plant, putative (EC:3.6.3.8); K01537 Ca2+-transporting ATPase [EC:3.6.3.8] (A)	Calcium-transporting ATPase 10, plasma membrane-type OS=Arabidopsis thaliana GN=ACA10 PE=1 SV=2	gi|255554448|ref|XP_002518263.1|:cation-transporting atpase plant, putative [Ricinus communis]
evm.model.scaffold_97.162	GO:0005515; protein binding; Molecular Function	IPR001611; Leucine-rich repeat::IPR003591; Leucine-rich repeat, typical subtype::IPR013210; Leucine-rich repeat-containing N-terminal, type 2	probable LRR receptor-like serine/threonine-protein kinase At4g36180; K13466 EIX receptor 1/2 (A)	Probable LRR receptor-like serine/threonine-protein kinase At4g08850 OS=Arabidopsis thaliana GN=At4g08850 PE=2 SV=3	gi|590689603|ref|XP_007043273.1|:Receptor like protein 1, putative [Theobroma cacao]
evm.model.scaffold_98.10	GO:0000166; nucleotide binding; Molecular Function::GO:0006812; cation transport; Biological Process::GO:0016021; integral to membrane; Cellular Component::GO:0019829; cation-transporting ATPase activity; Molecular Function::GO:0046872; metal ion binding; Molecular Function	IPR001757; Cation-transporting P-type ATPase::IPR004014; Cation-transporting P-type ATPase, N-terminal::IPR008250; P-type ATPase, A domain::IPR023214; HAD-like domain	putative calcium-transporting ATPase 13, plasma membrane-type; K01537 Ca2+-transporting ATPase [EC:3.6.3.8] (A)	Calcium-transporting ATPase 12, plasma membrane-type OS=Arabidopsis thaliana GN=ACA12 PE=2 SV=1	gi|720071505|ref|XP_010278086.1|:PREDICTED: putative calcium-transporting ATPase 13, plasma membrane-type [Nelumbo nucifera]
evm.model.scaffold_99.84	GO:0005515; protein binding; Molecular Function	IPR001611; Leucine-rich repeat::IPR003591; Leucine-rich repeat, typical subtype::IPR025875; Leucine rich repeat 4	probable LRR receptor-like serine/threonine-protein kinase At4g36180; K13466 EIX receptor 1/2 (A)	LRR receptor-like serine/threonine-protein kinase GSO2 OS=Arabidopsis thaliana GN=GSO2 PE=2 SV=2	gi|720046248|ref|XP_010270448.1|:PREDICTED: LRR receptor-like serine/threonine-protein kinase ERECTA [Nelumbo nucifera]
LOC_Os08g07100.1-evm.model.scaffold_74.97	GO:0000287; magnesium ion binding; Molecular Function::GO:0008152; metabolic process; Biological Process::GO:0010333; terpene synthase activity; Molecular Function::GO:0016829; lyase activity; Molecular Function	IPR001906; Terpene synthase, N-terminal domain::IPR005630; Terpene synthase, metal-binding domain	(-)-germacrene D synthase (EC:4.2.3.22 4.2.3.75); K15803 (-)-germacrene D synthase [EC:4.2.3.22 4.2.3.75] (A)	(-)-germacrene D synthase OS=Vitis vinifera GN=VIT_19s0014g04930 PE=1 SV=1	gi|147820357|emb|CAN69834.1|:hypothetical protein VITISV_025998 [Vitis vinifera]
NP_188072.1-D10	GO:0000287; magnesium ion binding; Molecular Function::GO:0008152; metabolic process; Biological Process::GO:0010333; terpene synthase activity; Molecular Function::GO:0016829; lyase activity; Molecular Function	IPR001906; Terpene synthase, N-terminal domain::IPR005630; Terpene synthase, metal-binding domain	(-)-germacrene D synthase (EC:4.2.3.22 4.2.3.75); K15803 (-)-germacrene D synthase [EC:4.2.3.22 4.2.3.75] (A)	(-)-germacrene D synthase OS=Vitis vinifera GN=VIT_19s0014g04930 PE=1 SV=1	gi|302143188|emb|CBI20483.3|:unnamed protein product [Vitis vinifera]
NP_193753.1-evm.model.scaffold_74.96	GO:0000287; magnesium ion binding; Molecular Function::GO:0008152; metabolic process; Biological Process::GO:0010333; terpene synthase activity; Molecular Function::GO:0016829; lyase activity; Molecular Function	IPR001906; Terpene synthase, N-terminal domain::IPR005630; Terpene synthase, metal-binding domain	(-)-germacrene D synthase (EC:4.2.3.22 4.2.3.75); K15803 (-)-germacrene D synthase [EC:4.2.3.22 4.2.3.75] (A)	(-)-germacrene D synthase OS=Vitis vinifera GN=VIT_19s0014g04930 PE=1 SV=1	gi|302143188|emb|CBI20483.3|:unnamed protein product [Vitis vinifera]

[truncated: 14 more sheets: Table S11, Table S12, Table S13, Table S14, Table S15, Table S16, Table S17, Table S18, Table S19, Table S20, Table S21, Table S22, Table S23, Table S24]
